# Supplementary material for: Accessory genes in tropical race 4 contributed to the recent resurgence of the devastating disease of Fusarium wilt of banana
Source: Research Square preprint supplement (doi:10.21203/rs.3.rs-3197485/v1), 2023-08-08
Supplement: Supplementary file 1 [file 64c3f73d5a8fba781dea0dfa.xlsx]

## Sheet: Table S1
Table S1 Fusarium oxysporum isolates used in this study, provided by Altus Vijoen (Stellenbosch University, South Africa), Randy C. Ploetz (University of Florida, USA) and Chunyu Li (Fruit Tree Research Institute, GDAAS, China)
		Isolates Number	Nomenclature	provider	Geological Locations	VCGs	Population	Mating Type	Host	Collect Year/Date
TR4	1	CAV300	CAV300-VCG01213-I-TR4	Altus Viljoen	Southeast Sumatra, Indonesia	01213	1	MAT 1-1	Valery	Before 1998
	2	811	811-VCG01213-I-TR4	Altus Viljoen	Indonesia	01213	1	MAT 1-1	Pisang Susu	Before 1998
	3	JV-11	JV-11-VCG01213-J-TR4	Randy C. Ploetz	Jordan (32N, 35.5E)	01213	1	MAT 1-1	Cavendish	2006
	4	789	789-VCG01213-16-A-TR4	Altus Viljoen	Middle Point, Northern Territory, Australia	01213/16	1	MAT 1-1	Cavendish	Before 1998
	5	1216	1216-VCG01216-C-TR4	Chunyu Li	Hainan-Ledong, China	01216	1	MAT 1-1	Cavendish,Brizilian (AAA)	2010
	6*	UK0001	UK0001-VCG01213-16-U-TR4	-	Cornwall, UK	01213/16	-	MAT 1-1	Musa sp.	-
VCG0121	1	CAV180	CAV180-VCG0121-T	Altus Viljoen	Taiwan	0121	1	MAT 1-2	-	Before 1998
	2	CAV2318	CAV2318-VCG0121-T	Altus Viljoen	Kuosin E, 2K,Taiwan	0121	1	MAT 1-2	Namwa (AAB)	2007
STR4	1	105	105-VCG0120-S-STR4	Altus Viljoen	Kiepersol,South Africa	0120	1	MAT 1-2	Cavendish	2004
	2	286	286-VCG0120-A-STR4	Altus Viljoen	Moorina, QLD,Australia	0120	1	MAT 1-2	Lady finger	Before 1998
	3	CAV045	CAV045-VCG0120-B-STR4	Altus Viljoen	Port Edward, South Africa	0120	1	MAT 1-2	Williams	2000
	4	LAP	LAP-VCG122-P-STR4	Randy C. Ploetz	Philippines	0122	1	MAT 1-1	Cavendish	Before 1998
	5	JB785	JB785-VCG0126-C-STR4	Chunyu Li	Guangdong, China	0126	1	MAT 1-2	Pisang Awak	-
	6	1089	1089-VCG0129-A-STR4	Altus Viljoen	Cooloolabin, QLD,Austrilia	0129	1	MAT 1-1	Lady finger	Before 1998
	7	788	788-VCG01210-C-STR4	Altus Viljoen	FHIA Villa Clara, Cuba	01210	1	MAT 1-1	Gros Michel	Before 1998
	8	1210	1210-VCG01210-C-STR4	Randy C. Ploetz	Sto. Domingo, Villa Clara, Cuba	01210	1	MAT 1-1	Gros Michel	-
	9	1211	1211-VCG01211-A-STR4	Randy C. Ploetz	Queensland,Australia	01211	1	MAT 1-2	SH3142	-
	10	1215	1215-VCG01215-N-STR4	Randy C. Ploetz	Onne, Nigeria	01215	1	MAT 1-2	Gros Michel	-
	11	195	195-VCG01219-I-STR4	Altus Viljoen	Indonesia	01219	1	MAT 1-1	Pisang Ambon	Before 1998
	12	1219	1219-VCG01219-I-STR4	Randy C. Ploetz	Cibinong Collection, Java, Indonesia	01219	1	MAT 1-1	Pisang raja garing	-
RACE2
	1	128	128-VCG0128-A-Race2	Randy	South johnstone, Queensland, Austrialia	0128	3	MAT 1-2	Bluggoe	-
RACE1
	1	GD02	GD02-VCG0123-C-Race1	Chunyu Li	Guangdong, China	0123	2	MAT 1-2	Pisang Awak	2010
	2	2260	2260-VCG124-S-Race1	Altus Viljoen	Katugastota, Katugastota, Central Sri-Lanka	0124	3	MAT 1-2	Gros Michel	2007
	3	STUGA1	STUGA1-VCG0125-U-Race1	Randy C. Ploetz	Bivaise Suburb Kampala, Uganda	0125	3	MAT 1-2	Bluggoe
	4	188	188-VCG01212-T-Race1	Altus Viljoen	Tenguero Station, Tanzania	01212	3	MAT 1-2	Ney Poovan	Before 1998
	5	1214	1214-VCG01214-M-Race1	Randy C. Ploetz	Misuku, Karonga, Malawi	01214	2	MAT 1-1	Harare	Before 1998
	6	JB189	JB189-VCG01214-M-Race1	Randy C. Ploetz	Misuku, hills, Karonga, Malawi	01214	2	MAT 1-1	Harare	Before 1998
	7	871	871-VCG01217-M-Race1	Altus Viljoen	Malaysia	01217	2	MAT 1-2	Pisang Rastali	Before 1998
	8	1217-1	1217-1-VCG01217-M-Race1	Randy C. Ploetz	Kg. Taboh, Naning, Negri Sembilan, Malaysia	01217	2	MAT 1-2	Pisang Rastali	Before 1998
	9	1218	1218-VCG01218-I-Race1	Altus Viljoen	Indonesia	01218	2	MAT 1-1	Pisang Siem	Before 1998
	10	623	623-VCG01220-A-Race1	Altus Viljoen	Carnarvon, Western Australia	01220	3	MAT 1-2	Williams	Before 1998
	11	2400	2400-VCG1220-A-Race1	Altus Viljoen	Carnarvon, Western Australia	01220	3	MAT 1-2	Cavendish	Before 1998
	12	2226	2226-VCG01221-C-Race1	Altus Viljoen	Chroy Ampil, Kbal Koh, Kien Svay, Kandal,Cambodia	01221	2	MAT 1-2	Namwa	2007
	13	GX05	GX05-VCG01221-C-Race1	Chunyu Li	Guangxi,China	01221	2	MAT 1-2	Pisang Awak, Guangfen 1(ABB)	2010
	14	998	998-VCG01222-U-Race1	Altus Viljoen	Uganda	01222	3	MAT 1-2	Kianja	Before 1998
	15	36115JD16	36115JD16-VCG01224-M-Race1	Randy C. Ploetz	Kuching, Seman Matang, Sarawak, Malaysia	01224	2	MAT 1-2	Pisang Ambon	?
Non	1	JB255	JB255-S-NON	Altus Viljoen	Kiepersol, South Africa	-	-	MAT 1-2	Musa soil	2005
	2	JB553	JB553-S-NON	Altus Viljoen	Kiepersol, South Africa	-	-	MAT 1-2	Musa soil	2005
	3	AB118	AB118-C-NON	Chunyu Li	Guangdong, China	-	-	MAT 1-1	Pisang Awak	-
	4	AB-2-8	AB-2-8-C-NON	Chunyu Li	Guangdong, China	-	-	MAT 1-1	Pisang Awak	-
	*: data from public database

## Sheet: Table S2
Table S2 Summary of pathogenicity assay tests on banana cultivars with Foc TR4, STR4, VCG0121 and race1
strains	varieties	DI=0	DI=1	DI=2	DI=3	DI=4
2318-VCG0121-TR4	Guangfen (Pisang Awak ABB) (Susceptible)	0	0	2	6	12
	Zhongjiao No.3 (Cavendish AAA) (Susceptible)	0	0	4	9	7
	Fenza (Pisang Awak ABB) (Resistant)	0	4	4	8	4
II5-VCG01213-TR4	Guangfen (Pisang Awak ABB) (Susceptible)	0	0	4	10	6
	Zhongjiao No.3 (Cavendish AAA) (Susceptible)	0	0	2	12	6
	Fenza (Pisang Awak ABB) (Resistant)	17	3	0	0	0
105-VCG0120-STR4	Guangfen (Pisang Awak ABB) (Susceptible)	0	1	4	5	10
	Zhongjiao No.3 (Cavendish AAA) (Susceptible)	16	4	0	0	0
	Fenza (Pisang Awak ABB) (Resistant)	15	5	0	0	0
GD02-VCG0123-Race1	Guangfen (Pisang Awak ABB) (Susceptible)	0	2	6	2	10
	Zhongjiao No.3 (Cavendish AAA) (Susceptible)	17	3	0	0	0
	Fenza (Pisang Awak ABB) (Resistant)	17	3	0	0	0
To evaluate Foc virulence, the disease severity of each tested plant was measured. The disease index was ranked as: 0, no symptoms;1, some brown spots in the inner rhizome; 2, < 25% of the inner rhizome show browning; 3, up to 3/4 of the inner rhizome show browning; and 4, entire inner rhizome and pseudostem are dark brown, dead). *20 seedlings per treatment *The number below the DI value indicat…

## Sheet: Table S3
Table S3 II5 chromosomal accessory sequence size comparing to Fol4287
Foc (Fol4287 chr), Mb	II5
Chr1 (chr1, core)	0.40284
Chr2 (chr2, core)	0.064364
Chr3 (chr4)	1.18644
Chr4 (chr5)	0.276384
Chr5 (chr7)	0.116354
Chr6 (chr8)	0.226717
Chr7 (chr9)	0.273761
Chr8 (chr10)	0.530643
Chr9 (chr11)	0.387909
Chr10 (chr12)	0.404041
Chr11 (chr13)	0.966135

## Sheet: Table S4
Table S4 Copy numbers of Helitrons by normalized read mappings
ID	Strider Heli1	FOXG_14222 Heli2	FOXG_06459 Heli3	FOXG_14988 Heli4	FOXG_19766 Heli5
811-VCG01213-I-TR4	7.92026	0	0	0.218518	0
789-VCG01213-16-C-TR4	9.38127	0.00311431	0.00240959	0.284296	0.00463145
CAV300-VCG01213-I-TR4	10.0771	0	0.00379106	0.255165	0
1216-VCG01216-C-TR4	14.1747	0	0	0.22383	0
JV-11-TR4	28.0502	0.0222848	0.0172421	0.741818	0.0220939
CAV2318-VCG0121-T	0.0544426	0.00138368	0.000802934	0.025432	0.000881892
180_VCG0121-T	0.0768098	0.00502575	0.0131237	0.0384888	0.0288286
CAV045-VCG0120-B-STR4	0.0200221	0	0	0.106098	0
LAP-VCG122-P-STR4	0.00486428	0	0	0.107687	0
JB785-VCG0126-C-STR4	0.031683	0.00235727	0.00729544	0.0474184	0.00200321
1089-VCG0129-A-STR4	0.00813938	0.367117	0	0.0498403	0
1211-VCG01211-A-STR4	0.0020063	0	0	0.149313	0
195-VCG01219-I-STR4	0.0285792	0	0	0.0331362	0.00215446
1215-VCG01215-N-STR4	0.0249999	0	0	0.0560357	0
1210-VCG01210-C-STR4	30.5756	0	0	1.06893	0
1214-VCG01214-M-Race1	6.90095	0	1.22665	0.0441121	0
1217-1-VCG01217-M-Race1	34.4371	0	0	0.192024	0
1218-VCG01218-I-Race1	52.1251	0	0.0011737	0.371136	0
36115JD16-VCG01224-M-Race1	35.1976	0	0.00254133	0.00469546	0.727117
GD02-VCG0123-C-Race1	60.6859	0	0	0.200255	0
GX05-VCG01221-C-Race1	31.356	0	0.00103306	0.21514	0.00170197
128-VCG0128-A-Race2	49.9321	0.104933	0	0.496308	0
188-VCG01212-T-Race1	30.4928	0	0	0.813401	0
2260-VCG124-J-Race1	112.307	0.117224	0	0.308597	0
623-VCG01220-A-Race1	65.8144	0	0	0.0231967	0
967-VCG0124-5-P-Race1	36.5902	0	0.00343516	0.635299	0.00251531
998-VCG01222-U-Race1	77.2626	0.0934218	0	1.4631	0.00248094
STUGA1-VCG0125-U-Race1	97.8271	0	0	1.46416	0
AB-2-8-C-NON	0.305314	0.129642	0	0.132378	0.640989
AB118-C-NON	0.00530329	0.110086	0	0.127397	0.815974
JB255-S-NON	0.0380335	0.0192561	0.00455241	0.179148	0.00363642
JB553-S-NON	0.0251122	0.0327629	0	0.139792	0

## Sheet: Table S5
Table S5 Heatmap of Shared chromosomal accessory sequence size between II5 and other Foc strains
TR4 II5, Mb	UK0001	CAV2318	CAV045	GD02
Chr1(chr1)	0.392903	0.303013	0.352992	0.303013
Chr2(chr2)	0.037189	0.018249	0.021962	0
Chr3 (chr4)	1.17403	1.09951	0.068441	0.066711
Chr4 (chr5)	0.255942	0.123091	0.114727	0.003926
Chr5 (chr7)	0.106444	0.026744	0	0
Chr6 (chr8)	0.205218	0.068547	0.111087	0			Size, Mb
Chr7 (chr9)	0.253321	0.210033	0.121225	0.032929		1.25	1.25
Chr8 (chr10)	0.511064	0.463939	0.110118	0.193544		1	1
Chr9 (chr11)	0.37183	0.038008	0.337086	0.273614		0.75	0.75
Chr10 (chr12)	0.317397	0.246178	0.241544	0.189757		0.5	0.5
Chr11 (chr13)	0.942587	0.76276	0.685475	0.517769		0.25	0.25
Total	4.56792	3.36007	2.16466	1.58126		0	0

## Sheet: Table S6
Table S6 Statistics of the RNA-seq data and reads mapped to the reference genome II5 at different inoculation time points
	Sample ID	average reads per sample	# of reads mapped to Foc genome	% reads mapped to Foc genome	# of reads mapped to banana genome	% reads mapped to banana genome
TR4	BX-TR4-18h-2	5.17926e+07	6120568	0.118221	4.5672e+07	0.881779
	BX-TR4-32h-1	48783837	1.69182e+07	0.346808	3.18656e+07	0.653192
	BX-TR4-56h-1	4.09332e+07	2.32608e+07	0.568463	17672398	0.431537
Race1	BX-FOC1-18h-1	4.99767e+07	1018980	0.0203872	4.89577e+07	0.979613
	BX-FOC1-32h-1	5.8259e+07	3.39822e+06	0.0584038	5.48607e+07	0.941596
	BX-FOC1-56h-1	38324607	1.19201e+07	0.310983	2.64045e+07	0.689017

## Sheet: Table S7
Table S7 Expression of nitric oxide biosynthesis, denitrification and electron transport chain complex genes during infection
Gene Category	Gene ID	Annotation	R1_18 (FPKM)	R1_32	R1_56	TR4_18	TR4_32	TR4_56
NO biosynthesis	Gene_2699	NAD(+)-dependent formate dehydrogenase	409.588	4627.13	454.351	18008.2	34876	391
	Gene_3134	Nitrate reductase	7.47057	99.0816	2.25781	141.387	94.571	2.4664
	Gene_3561	Nitrate reductase	26.1348	122.318	22.7561	315.653	177.395	100.988
	Gene_9725	Nitrite reductase	61.1039	348.487	86.1052	382.808	280.147	279.62
Denitrification	Gene_12004	Flavohaemoglobin	149.356	6416.99	1384.52	4041.92	7499.69	642.663
	Gene_12816	Flavohaemoglobin	80.9331	509.814	11.781	757.832	1425.23	18.3449
	Gene_472	Flavohaemoglobin	75.0711	430.914	423.733	296.578	511.714	379.337
	Gene_15332	Cytochrome P450 55A1	384.443	9430.26	856.468	18301.6	27072.1	888.63
	Gene_8127	GSNO reductase/class III alcohol dehydrogenases	32.4299	35.5224	38.6726	76.2214	48.961	39.8733
	Gene_8940	GSNO reductase/Glutathione-dependent formaldehyde dehydrogenase	0	0.151822	0.507524	19.639	20.5085	1.2386
Electron transport chain complex I	Gene_9921	NADH:ubiquinone oxidoreductase subunit A2	251.591	180.362	172.342	221.591	149.485	221.863
	Gene_3568	NADH:ubiquinone oxidoreductase subunit A5	385.159	271.302	349.231	350.098	274.581	392.758
	Gene_5207	NADH:ubiquinone oxidoreductase subunit A6	382.208	441.305	489.589	554.302	509.377	380.876
	Gene_6710	NADH:ubiquinone oxidoreductase subunit A8	337.491	230.523	277.898	282.214	265.843	278.608
	Gene_12114	NADH:ubiquinone oxidoreductase subunit A9	122.032	116.595	170.701	31.4313	295.957	147.979
	Gene_8042	NADH:ubiquinone oxidoreductase subunit A9	34.4751	4.66556	2.13112	12.1461	34.638	2.98352
	Gene_3070	NADH:ubiquinone oxidoreductase subunit A9	174.67	144.416	164.521	344.071	234.802	243.178
	Gene_10722	NADH:ubiquinone oxidoreductase subunit A12	240.78	229.364	229.184	294.453	241.043	290.579
	Gene_11002	NADH:ubiquinone oxidoreductase subunit B3	233.156	241.845	285.419	346.064	301.827	307.789
	Gene_15301	NADH:ubiquinone oxidoreductase subunit B4	0	1.30314	0.945889	0.30992	0.837418	0.731294
	Gene_11880	NADH:ubiquinone oxidoreductase subunit B4	0	0	1.12289	0.338765	2.14382	0.605082
	Gene_7538	NADH:ubiquinone oxidoreductase subunit B4	2.43457	2.16353	1.71901	2.81695	5.51073	3.00843
	Gene_7537	NADH:ubiquinone oxidoreductase subunit B8	265.381	221.38	276.423	362.12	377.108	372.02
	Gene_6468	NADH:ubiquinone oxidoreductase core subunit S3	267.713	202.658	229.093	389.294	277.938	267.251
	Gene_8724	NADH:ubiquinone oxidoreductase core subunit S4	199.443	178.001	197.964	355.514	258.846	242.143
	Gene_6352	NADH:ubiquinone oxidoreductase core subunit S7	0	0	0.0917371	1.65291	0.719902	0.178461
	Gene_8154	NADH:ubiquinone oxidoreductase core subunit S7	305.077	259.815	288.87	366.319	295.184	273.978
	Gene_6454	NADH:ubiquinone oxidoreductase core subunit V1	338.54	367.218	356.55	463.868	472.851	310.084
	Gene_254	NADH-ubiquinone oxidoreductase subunit NI9M	304.613	255.062	320.008	452.558	382.755	297.921
	Gene_911	NADH-ubiquinone oxidoreductase 21 kDa subunit	479.73	347.46	420.497	884.525	838.557	430.733
	Gene_10259	NADH-ubiquinone oxidoreductase 21 kDa subunit	546.354	419.683	412.995	679.657	635.035	466.296
Electron transport chain complex II	Gene_6346	Succinate dehydrogenase	333.041	302.961	460.564	399.365	1210.6	589.946
	Gene_4845	Succinate dehydrogenase	449.137	698.655	649.987	1029.52	986.167	450.742
	Gene_10953	Succinate dehydrogenase	381.812	398.007	394.443	590.149	714.71	357.369
	Gene_10740	Succinate dehydrogenase	370.242	599.487	720.571	871.041	1352.8	438.865
	Gene_3691	Succinate dehydrogenase	115.709	477.533	22.0106	198.185	441.328	8.6964
	Gene_490	Succinate dehydrogenase	375.773	692.439	709.545	907.487	1056.72	565.907
Electron transport chain complex III	Gene_1092	Cytochrome c1	430.589	570.278	735.743	1126.55	1053.31	591.232
	Gene_7200	Cytochrome b-c1 complex subunit Rieske	723.43	917.736	849.11	1355.13	1635.12	918.273
	Gene_743	Ubiquinol-cytochrome c reductase subunit 1	583.971	759.632	793.336	1265.18	1310.71	741.472
	Gene_605	Ubiquinol-cytochrome c reductase subunit 2	362.436	413.433	585.136	975.968	1018.91	508.776
	Gene_8777	Ubiquinol-cytochrome c reductase subunit 2	60.1571	80.2291	39.0859	61.7291	87.6338	45.6065
	Gene_743	Ubiquinol-cytochrome c reductase subunit 2	583.971	759.632	793.336	1265.18	1310.71	741.472
	Gene_8075	Ubiquinol-cytochrome c reductase subunit 7	796.272	857.549	904.291	1385.68	1094.49	931.397
	Gene_8061	Ubiquinol-cytochrome c reductase subunit 8	852.327	900.301	953.233	1115.84	937.347	1034.03
Electron transport chain complex IV	Gene_4633	Cytochrome c oxidase subunit 10	62.1592	116.262	117.367	198.012	240.776	72.3694
	Gene_10169	Cytochrome c oxidase subunit 6a	1150.07	1570.65	1740.66	2500.75	2732.18	1473.27
	Gene_11355	Cytochrome c oxidase subunit 11	38.0812	68.9744	73.9726	73.3052	90.2704	70.5519

## Sheet: Table S8
Table S8 Top 20 expressed banana genes during host-pathogen interaction
Gene	Functional Annotation	R1_18h (FPKM)	R1_32h	R1_56h	TR4_18h	TR4_32h	TR4_56h
Ma01_g10480	metallothionein-like protein 2A	10627.9	5329.24	19059.2	9252.61	12833	5113.44
Ma10_g22670	metallothionein-like protein type 2	3593.04	3838.12	5446.65	8687.74	6404.08	3779.5
Ma02_g15080	pathogenesis-related protein 1-like	12687	12959.2	13202.1	7426.34	64424.2	15770.9
Ma08_g34150	Pathogenesis-related protein 1 -like	10298.7	11339.4	11341.5	11248.7	14954.8	6004.33
Ma03_g08160	Pathogenesis-related protein 1 (PR10-like)	3289.71	7072.78	2468.81	5690.21	4274.21	1026.74
Ma06_g18530	pathogen-related protein-like	13024.5	20235.5	6654.16	22955.4	55225.9	12276.4
Ma06_g03120	pathogenesis-related protein PR-4-like, has signalP	1091.45	2098.86	401.635	326.953	5450.55	817.733
Ma09_g31140	Putative germin-like protein 2-1	1402.27	3523.69	1204.76	2453.02	9899.06	1923.47
Ma09_g31150	Putative germin-like protein 2-1	764.896	3297.5	1544.14	331.277	12111.6	5351.27
Ma02_g10610	Non-symbiotic hemoglobin -1	7863.16	12033.6	4336.74	13317.6	12730.4	3805.89
Ma10_g22190	Probable aquaporin TIP2-2	7115.33	10936.6	4878.53	13208.8	30412.5	12637.9
Ma02_g10590	L-gulonolactone oxidase-like	1534.22	4654.33	1622.97	2580.27	8492.27	4050.97
Ma02_g16130	isoflavone reductase-like protein	8128.59	10290.3	3708.63	9628.65	8036.35	3399.06
Ma03_g22900	extradiol ring-cleavage dioxygenase-like	2819.04	4204.77	1761.67	5882.84	3901.99	931.115
Ma04_g13620	glu S.griseus protease inhibitor-like	1395.05	4391.38	4323.83	1306.48	6563.92	15039.3
Ma04_g14530	glycine-rich RNA-binding protein 7-like	3046.29	3798.91	6041.93	9012.77	8213.98	4361.47
Ma06_g21680	late embryogenesis abundant protein Lea5-D	4434.46	5375.01	2752.97	14783.3	10206.6	1710.04
Ma08_g34160	phytohormone-binding protein-like	16444.8	26323.4	9164.3	35827.2	45268.1	11236.9
Ma10_g07930	Putative Stem-specific protein TSJT1	2894.47	6938.3	1873.75	6363.05	12347.8	3737.39
Ma11_g12640	uncharacterized	5386.17	9967.89	4661.88	15482.8	16248	4647.59

## Sheet: Table S9
Table S9 Clusters of co-expressed banana and fungal genes
Banana clusters	Number of genes	Fungal clusters	Number of genes
Plant-C1	674	Foc-C1	410
Plant-C2	918	Foc-C2	890
Plant-C3	493	Foc-C3	363
Plant-C4	999	Foc-C4	578
Plant-C5	830	Foc-C5	510
Plant-C6	828	Foc-C6	774
Plant-C7	994	Foc-C7	846
Plant-C8	1729	Foc-C8	581
Plant-C9	491	Foc-C9	231
Plant-C10	1301	Foc-C10	395
Plant-C11	447	Foc-C11	599
Plant-C12	917	Foc-C12	286
Plant-C13	522	Foc-C13	500
Plant-C14	1156	Foc-C14	694
Plant-C15	890	Foc-C15	439
Plant-C16	591	Foc-C16	478
Plant-C17	686	Foc-C17	385
Plant-C18	1089	Foc-C18	443
Plant-C19	930	-	-
Plant-C20	1261	-	-
Plant-C21	1180	-	-
Plant-C22	1022	-	-
Plant-C23	562	-	-
Plant-C24	394	-	-

## Sheet: Table S10
Table S10 Gene expressions of plant-C22
ID	R1_18h (FPKM)	R1_32h	R1_56h	TR4_18h	TR4_32h	TR4_56h
Ma00_g01240	0.929778	3.71577	1.33936	3.17013	1.71352	0.423723
Ma00_g01380	2.34701	2.91402	0.143974	6.89323	1.69213	0.539943
Ma00_g02240	97.6847	179.206	35.0588	125.118	113.541	19.4228
Ma00_g02460	82.9709	382.171	59.4255	129.071	48.5993	14.5785
Ma00_g02690	4.54194	2.90564	1.03967	6.79652	1.22807	0.225151
Ma00_g02980	16.467	19.7179	14.9247	19.1581	15.9213	14.6325
Ma00_g03000	59.7233	67.7332	58.4518	122.332	50.3159	26.8895
Ma00_g03070	20.2517	18.2681	18.4951	22.2362	22.0448	7.85874
Ma00_g04520	44.1953	83.1101	23.1265	65.3491	54.0752	26.1537
Ma00_g04960	22.4323	40.6903	10.7345	26.7637	15.3376	3.02263
Ma01_g00960	107.285	136.322	75.2032	215.665	113.064	73.9302
Ma01_g01750	5.66246	7.39681	6.27265	10.3925	6.07915	4.57295
Ma01_g02200	49.8745	21.2223	12.2613	83.6621	38.2984	5.13419
Ma01_g02700	334.71	383.419	153.884	449.047	246.609	196.783
Ma01_g02750	3.34939	6.75063	1.13019	3.96813	2.12519	0.823861
Ma01_g02990	98.4009	123.367	93.3458	154.326	105.646	74.6143
Ma01_g03000	9.3879	10.1395	5.01862	9.16451	15.0383	3.94908
Ma01_g03050	2.40956	2.73868	1.9116	3.71374	1.82849	0.830736
Ma01_g03060	17.0791	17.481	9.01034	24.3885	13.8073	4.14451
Ma01_g03540	209.643	235.815	169.272	296.511	213.592	163.447
Ma01_g03670	38.9269	38.5283	24.9238	171.592	62.9145	5.29709
Ma01_g03680	1.526	3.60093	2.17281	3.08804	3.76906	1.07325
Ma01_g04450	9.70396	13.7954	6.17199	15.2075	11.4359	3.68142
Ma01_g04460	194.355	262.552	125.994	300.445	204.468	83.213
Ma01_g04660	2.01535	2.39843	1.14401	1.97149	2.07548	1.16297
Ma01_g05330	48.3868	59.2458	48.7406	59.014	60.5607	45.0536
Ma01_g05360	89.6449	108.098	67.9185	129.228	87.2143	31.9921
Ma01_g05460	8.23477	7.07522	6.69027	10.6826	9.67491	4.56236
Ma01_g05750	31.2671	42.1417	14.659	29.4464	30.4942	15.0444
Ma01_g05760	41.0174	75.341	35.7406	45.0644	38.417	25.1063
Ma01_g05890	12.9829	16.2097	5.18918	18.9895	15.6281	5.80171
Ma01_g06230	294.83	496.575	90.289	342.927	366.338	76.2309
Ma01_g06630	27.2808	19.2177	6.88706	22.9913	18.7752	1.75436
Ma01_g06850	10.0732	11.8535	4.29672	12.0116	14.0467	4.23998
Ma01_g06990	10.4586	15.9434	11.6607	15.534	18.9731	6.41823
Ma01_g07190	18.5908	22.5317	18.4091	29.4662	16.0507	10.8242
Ma01_g08500	34.0116	39.9704	28.9071	47.9005	34.5247	28.3726
Ma01_g08600	91.5673	94.6719	56.4336	117.083	110.673	58.8627
Ma01_g09020	8.44586	7.72754	6.42638	8.49706	7.66612	4.18212
Ma01_g09780	46.6334	50.1777	44.2745	83.5106	63.5383	25.2291
Ma01_g10230	198.129	221.508	129.127	239.804	219.865	91.6183
Ma01_g10990	19.6086	122.714	4.71152	26.0794	31.8989	3.97157
Ma01_g11430	21.0326	22.4237	21.3102	20.8231	22.1085	14.2879
Ma01_g11960	10.1295	18.4133	5.0191	46.0212	51.1088	1.43238
Ma01_g12100	3.52197	3.41983	2.05153	4.14996	4.9689	1.00152
Ma01_g12410	449.988	601.669	167.143	708.539	620.095	150.172
Ma01_g13550	516.359	620.68	265.326	738.555	410.903	145.808
Ma01_g14120	9.33269	13.5309	3.55271	9.64284	10.3765	1.13906
Ma01_g14180	133.716	113.211	77.2754	130.759	87.0302	57.1438
Ma01_g14190	67.8577	100.719	47.5136	68.0055	60.0013	42.0562
Ma01_g14390	7.72841	9.39863	6.69437	9.46177	6.41649	5.67892
Ma01_g14400	11.9505	12.0729	7.49468	12.5061	11.507	6.15245
Ma01_g14540	1148.99	1326.06	655.433	2129.06	1304.3	439.704
Ma01_g14640	55.1129	71.6759	35.5087	84.0232	67.9969	27.643
Ma01_g15930	125.279	153.12	131.927	301.444	158.543	33.8315
Ma01_g16290	3.80433	11.1266	5.52424	9.20241	5.68346	1.18792
Ma01_g16510	335.08	326.575	120.06	237.368	191.961	57.2442
Ma01_g16520	25.828	26.4195	3.29837	40.3836	20.2641	3.5143
Ma01_g16650	125.344	162.16	39.0186	104.804	101.17	31.0691
Ma01_g16800	277.695	500.027	242.592	379.951	198.826	51.8502
Ma01_g16810	1495.66	3825.72	1140	2141.06	1206.27	452.383
Ma01_g17110	99.8722	119.829	38.4772	76.9902	97.0513	31.3111
Ma01_g17530	2.2893	2.9245	2.36722	3.60345	2.62933	1.96962
Ma01_g17560	159.344	177.633	92.0078	280.018	171.268	36.3747
Ma01_g18290	6.64037	8.92855	7.75499	8.86731	7.56966	3.76937
Ma01_g18830	98.4399	143.885	68.6938	122.625	75.4403	60.734
Ma01_g18840	101.898	114.987	84.2741	178.665	122.729	43.9344
Ma01_g19240	31.3155	30.7705	12.3454	38.7779	17.0186	7.36607
Ma01_g19460	3.00655	3.57693	2.48764	4.01986	3.97319	1.65733
Ma01_g19510	38.9905	39.8387	36.9695	92.4704	42.672	14.0317
Ma01_g19900	6.20908	4.10219	4.2493	7.34768	6.74116	2.3498
Ma01_g19990	17.7442	19.3112	10.8391	34.4937	28.9194	8.73139
Ma01_g20850	15.3046	19.9501	13.1341	26.501	22.8539	9.9631
Ma01_g21220	24.6693	43.2112	12.9066	52.4237	32.236	15.9468
Ma01_g21430	127.79	162.401	78.0486	90.3719	73.7175	14.4318
Ma01_g21610	3.64658	6.70204	3.39375	4.36316	3.4509	2.32703
Ma01_g21650	41.325	28.9199	12.2284	38.4499	36.709	7.58073
Ma01_g22460	62.0661	71.8873	36.4684	99.9471	102.462	29.8524
Ma02_g00070	378.376	454.341	190.209	880.983	701.314	61.0923
Ma02_g00280	71.2703	87.6761	54.2695	88.3313	38.1522	22.6967
Ma02_g00720	15.5889	17.5146	14.9373	23.7574	15.2493	10.478
Ma02_g01130	238.683	883.028	84.906	409.233	564.86	71.6797
Ma02_g01650	53.7162	77.7032	44.539	97.8687	81.4007	30.8261
Ma02_g02050	60.2879	61.9618	51.689	77.5042	77.3278	37.9445
Ma02_g02190	23.0811	35.7054	20.0089	37.4088	40.0187	15.5927
Ma02_g02410	51.82	122.39	25.4379	59.122	79.7833	13.9052
Ma02_g02540	90.1295	119.174	94.1912	89.2469	84.2976	48.2482
Ma02_g02620	5.92892	7.87058	4.95469	7.74862	5.06118	4.41062
Ma02_g02860	382.045	391.136	102.168	522.702	240.923	88.8346
Ma02_g03090	81.567	102.915	83.0444	121.668	149.703	43.3987
Ma02_g03980	43.1311	46.4626	40.0748	50.9275	45.7234	32.9262
Ma02_g04010	3.19186	2.36074	2.29663	3.04878	3.07586	1.03147
Ma02_g04260	34.5076	42.5273	30.325	45.973	35.3949	26.2598
Ma02_g04370	13.9326	25.0826	12.616	21.538	16.9266	7.68159
Ma02_g04390	25.0386	41.255	23.5572	38.9469	34.4248	21.6323
Ma02_g04400	70.7384	48.2908	27.2516	112.735	38.6457	15.8716
Ma02_g04640	33.8157	55.8583	20.7915	55.7911	69.8514	15.2032
Ma02_g04770	3.73222	4.66021	2.64426	5.26356	3.82574	1.39113
Ma02_g05060	69.7991	79.3363	61.6234	84.4577	64.2248	39.7713
Ma02_g05410	31.5248	49.3096	37.043	47.0639	39.0819	26.8772
Ma02_g05810	113.204	167.941	86.7793	112.603	130.016	55.9738
Ma02_g05950	64.3449	48.3291	24.807	96.5534	14.6876	2.83686
Ma02_g06130	0.985996	0.879736	0.265289	1.03701	0.419535	0.212197
Ma02_g06190	11.8662	27.4632	13.7799	53.2149	30.4816	5.77672
Ma02_g06820	34.0871	47.5052	13.8567	45.3973	13.0703	3.11782
Ma02_g07050	195.375	133.461	110.139	254.943	168.999	72.7967
Ma02_g07330	37.9316	35.889	34.6523	53.9677	39.954	21.1008
Ma02_g07350	126.831	202.688	98.196	225.028	187.471	76.3348
Ma02_g07650	61.2466	60.7619	46.5543	125.352	72.9982	19.1908
Ma02_g08060	61.9593	74.3993	71.302	87.8259	77.2094	45.4202
Ma02_g08420	49.894	57.1929	32.3323	96.1085	47.2713	19.7723
Ma02_g08440	90.9324	95.6078	29.3731	278.071	97.135	28.1804
Ma02_g08450	210.505	213.272	62.9633	531.016	165.701	43.6888
Ma02_g08760	4.13727	5.28513	3.84292	3.96776	4.84707	1.0309
Ma02_g09220	2.02194	2.98757	1.47166	4.73558	1.48494	0.409795
Ma02_g09230	211.679	349.869	131.421	441.723	361.175	108.791
Ma02_g09540	26.7201	46.5419	22.4017	46.7056	42.5811	15.5253
Ma02_g09950	1327.91	622.823	475.012	2180.2	991.765	120.866
Ma02_g10150	6.02012	7.77741	5.28911	6.20492	4.87208	1.97564
Ma02_g10610	7863.16	12033.6	4336.74	13317.6	12730.4	3805.89
Ma02_g10830	45.8801	48.4485	21.4729	61.6481	41.7401	11.7812
Ma02_g11810	24.5529	43.5306	20.1066	44.1589	40.8941	11.3735
Ma02_g11820	9.53446	10.4213	7.33555	12.2481	4.73163	2.15877
Ma02_g12040	35.0439	38.4998	19.7413	127.388	60.925	4.53142
Ma02_g12310	24.4098	40.2172	18.9228	57.8051	38.8203	14.7803
Ma02_g13720	12.9137	15.8999	5.13625	17.8034	12.9318	1.47939
Ma02_g14280	80.1994	174.64	52.2351	187.706	73.2745	55.8508
Ma02_g14320	42.3784	62.779	25.8511	35.8735	46.7867	20.414
Ma02_g15100	127.068	150.877	65.8269	168.767	181.665	59.2428
Ma02_g15160	54.5163	61.1486	9.52315	46.9565	22.8569	5.63818
Ma02_g15340	422.091	368.168	193.275	391.129	248.739	34.1929
Ma02_g15610	55.874	35.3955	23.4036	80.0816	73.8551	10.2707
Ma02_g16130	8128.59	10290.3	3708.63	9628.65	8036.35	3399.06
Ma02_g16260	12.3121	15.3377	9.67493	20.9593	16.126	8.54558
Ma02_g16370	4.72663	10.2359	5.48846	11.0701	12.1351	3.67894
Ma02_g16500	61.5375	62.245	44.1459	74.6901	71.9078	28.06
Ma02_g16720	16.655	35.3496	19.3072	32.9611	31.4056	14.1145
Ma02_g17250	316.706	279.746	63.8193	274.785	258.365	20.9507
Ma02_g17330	16.3624	24.7972	12.4274	21.4878	14.9436	9.3845
Ma02_g17970	67.3025	65.6946	55.7293	60.2765	61.2688	31.4421
Ma02_g17990	380.975	370.145	145.349	643.562	507.602	74.5777
Ma02_g18000	1380.93	888.951	286.306	2014.11	981.566	208.843
Ma02_g18360	37.6792	43.1249	9.77342	28.4582	8.7967	2.76933
Ma02_g18690	92.5157	129.617	79.5607	100.936	143.1	56.432
Ma02_g18740	38.9004	39.1269	24.9659	71.9506	15.4166	5.18253
Ma02_g18860	1.42045	1.45943	0.337155	4.14108	0.730052	0.095754
Ma02_g19250	71.1973	71.444	46.5803	89.8887	59.9313	42.0053
Ma02_g19280	46.2975	32.8622	16.0636	29.5263	30.699	2.55487
Ma02_g20150	36.2789	49.5213	26.0229	36.7179	45.676	21.8925
Ma02_g20170	35.6662	54.9646	29.8059	63.8451	37.9059	30.5769
Ma02_g20490	40.3079	42.1302	23.1998	65.1187	49.1444	17.4932
Ma02_g21830	146.8	200.705	106.544	393.139	313.31	63.0274
Ma02_g22080	11.7195	12.9879	9.37304	17.319	12.6467	9.38592
Ma02_g22090	38.8068	71.433	47.4263	120.64	66.1199	19.0779
Ma02_g22100	45.6285	27.314	13.9834	36.4705	22.9227	4.10349
Ma02_g22120	4.49419	3.96345	2.75664	6.28394	5.14671	1.98114
Ma02_g22410	25.3688	38.4194	27.7568	71.2841	43.9013	15.1966
Ma02_g22540	72.9089	128.921	59.0823	103.858	85.0351	32.0396
Ma02_g22920	37.3845	43.0643	32.0465	61.9595	43.6998	20.1814
Ma02_g23270	469.542	555.715	394.924	593.154	615.42	355.04
Ma02_g23690	0.942022	1.44065	0.160264	0.926431	0.585348	0.0489904
Ma02_g23850	532.036	949.731	688.663	1221.4	937.018	416.817
Ma03_g00320	13.8813	17.3191	13.8238	18.6569	11.2652	8.63796
Ma03_g00650	34.0412	56.4823	33.7704	62.5924	51.7362	26.9155
Ma03_g00830	10.2107	18.3337	6.45511	12.0501	11.9801	6.45138
Ma03_g01620	126.789	209.897	134.766	232.575	263.666	71.0438
Ma03_g02050	39.9334	32.75	12.7284	36.2468	32.6701	13.0779
Ma03_g02180	49.3577	65.4328	53.9521	72.1145	62.3401	42.7174
Ma03_g02320	35.0295	44.6695	26.1523	54.5571	38.1348	19.5336
Ma03_g02640	91.6806	274.795	49.0985	141.902	180.561	39.4537
Ma03_g02840	6.55196	7.3324	6.56536	9.88596	4.60863	1.65113
Ma03_g02970	22.3538	33.541	22.8208	24.8953	32.8582	14.1721
Ma03_g03270	3.78166	5.28727	2.16076	3.36701	3.08411	1.26627
Ma03_g03630	24.4798	27.9727	14.5921	46.9174	33.2778	4.80444
Ma03_g03830	150.796	84.7169	39.4077	197.94	127.891	25.8497
Ma03_g04190	8.13852	16.5852	5.36123	16.3656	12.5466	5.39789
Ma03_g04890	22.4368	30.3879	13.5654	22.0366	23.8233	8.60347
Ma03_g05380	455.587	652.556	368.065	692.443	343.976	269.728
Ma03_g05400	1116.62	1685.34	983.281	1922.44	1154.17	698.387
Ma03_g05480	114.4	156.083	50.175	123.193	110.428	61.6517
Ma03_g06890	1.90807	4.09678	0.713157	2.86616	5.35129	0.310647
Ma03_g07420	308.319	349.698	103.641	296.154	136.464	77.9966
Ma03_g08080	46.2911	100.796	42.0241	96.1775	39.113	5.54391
Ma03_g08140	493.597	760.329	284.084	755.84	305.579	78.4283
Ma03_g08150	430.274	664.13	283.029	683.565	246.007	61.3256
Ma03_g08160	3289.71	7072.78	2468.81	5690.21	4274.21	1026.74
Ma03_g08490	46.4003	38.1141	30.3691	54.8092	34.1441	24.2223
Ma03_g08870	37.8384	41.4626	30.232	48.0591	35.0187	8.11327
Ma03_g09080	65.4775	72.5944	65.9887	96.6614	83.3268	30.8838
Ma03_g09430	17.3612	19.588	17.3871	19.5334	19.108	16.2318
Ma03_g09880	26.0396	9.81769	10.1031	36.0559	17.3073	2.09235
Ma03_g10050	257.412	597.009	63.1075	193.004	343.78	65.5357
Ma03_g10500	9.65287	11.4125	9.71905	13.1681	10.355	8.97159
Ma03_g11650	85.8757	152.344	62.3387	84.222	47.0804	17.8003
Ma03_g12020	23.5165	27.1212	19.5987	51.6184	35.9453	12.6444
Ma03_g12340	104.197	239.433	82.9636	220.805	339.711	35.1355
Ma03_g12390	19.3098	52.4877	41.5483	110.939	61.773	4.49261
Ma03_g12650	149.333	174.195	77.9409	169.215	221.304	73.5407
Ma03_g13060	130.334	107.867	56.9503	438.637	203.695	8.66719
Ma03_g14280	52.464	63.9536	46.3144	80.3783	53.0849	35.6209
Ma03_g14740	83.8994	126.011	46.3992	167.455	117.165	25.5756
Ma03_g14750	2674.22	4113.41	1491.01	5237.41	5094.16	1147.27
Ma03_g15050	58.4617	67.0382	39.0749	70.1983	57.7908	43.3666
Ma03_g15270	14.7314	16.161	10.1148	23.4661	15.7439	6.39765
Ma03_g15360	7.83301	15.3797	1.65629	11.4945	8.62961	1.99036
Ma03_g15650	1.78688	3.34483	1.62766	2.08128	2.33186	1.05851
Ma03_g17030	20.0862	19.2449	6.58883	21.5932	19.5201	7.26292
Ma03_g17730	75.1032	107.833	51.0873	108.214	112.661	46.6089
Ma03_g18130	69.5258	51.6019	17.0326	60.5443	22.8225	8.39987
Ma03_g18710	29.8507	39.9967	24.1059	30.1351	49.0733	15.7113
Ma03_g19150	201.425	244.12	188.36	450.118	377.123	68.5537
Ma03_g19420	135.751	197.421	96.2724	201.527	196.033	84.4025
Ma03_g19610	227.084	281.013	186.66	249.781	316.682	160.809
Ma03_g19830	397.367	325.849	261.58	787.641	765.91	79.1959
Ma03_g19930	15.3143	13.8144	12.5375	17.9697	13.3267	10.5323
Ma03_g20130	74.2984	73.2788	60.4007	95.7658	102.822	43.6473
Ma03_g20490	96.1115	110.685	84.7393	110.877	148.535	56.3852
Ma03_g20620	16.362	28.1289	16.4985	32.7626	15.2958	3.28792
Ma03_g20800	188.599	388.613	86.9071	359.457	181.061	89.5718
Ma03_g21060	533.336	838.962	706.613	855.823	547.787	214.02
Ma03_g21240	344.658	203.433	65.0417	943.129	340.534	86.7339
Ma03_g21400	7.05193	14.6571	6.59136	12.7091	8.27602	5.03165
Ma03_g21540	11.3749	9.36514	6.93841	30.5229	8.41705	2.69544
Ma03_g21700	139.119	163.7	117.376	166.258	174.193	86.8277
Ma03_g21980	23.6278	62.5171	20.9841	41.4057	78.3327	12.1612
Ma03_g22000	36.3859	45.4938	8.94074	69.9089	54.3251	9.41977
Ma03_g22410	24.2938	31.2615	20.4858	29.9518	24.9024	21.5508
Ma03_g22900	2819.04	4204.77	1761.67	5882.84	3901.99	931.115
Ma03_g23450	13.2377	15.2993	8.99593	18.5119	16.1133	9.42658
Ma03_g23580	595.936	673.836	176.156	1528.02	1102.41	199.057
Ma03_g23610	56.9812	88.6376	26.2282	106.224	55.7333	20.1298
Ma03_g24160	24.1504	27.4238	9.88062	30.607	13.5868	6.89519
Ma03_g24670	16.7413	14.4848	5.36577	14.7228	6.48392	3.39329
Ma03_g25200	6.69407	5.89781	4.47474	8.91225	7.63626	3.84293
Ma03_g25270	410.897	718.64	280.57	711.017	734.529	123.559
Ma03_g25320	56.4807	80.5976	63.7928	132.205	65.3198	39.0459
Ma03_g25540	36.501	64.137	20.7251	53.8197	62.4566	16.6791
Ma03_g25820	87.5721	84.9876	50.149	77.7578	61.187	39.9141
Ma03_g25990	2.00137	2.45061	1.18285	2.84091	3.13876	0.566547
Ma03_g26060	5.0546	7.34224	3.68654	6.75748	4.49082	3.58641
Ma03_g26310	3.98006	3.93481	3.58833	4.96054	6.08993	0.80791
Ma03_g27040	1.46367	3.98274	0.624831	3.19175	1.30834	0.428238
Ma03_g27370	283.695	205.841	171.67	316.655	167.024	91.2045
Ma03_g27440	24.6883	33.6202	6.33457	36.0905	15.0162	9.2175
Ma03_g27520	2.68768	2.93537	1.49077	3.71713	2.17144	1.51307
Ma03_g27960	14.1035	19.5225	7.01385	15.0048	13.0141	7.90055
Ma03_g28290	83.7717	61.9332	29.1509	200.937	26.1135	3.23285
Ma03_g29150	20.1174	23.773	5.45763	17.7868	19.165	1.22119
Ma03_g29460	183.102	264.648	183.597	232.131	309.198	78.9284
Ma03_g29760	3.40796	4.92568	3.2315	3.52905	2.97408	1.28003
Ma03_g30250	410.211	497.154	230.708	496.791	759.242	152.63
Ma03_g30540	11.0497	10.9803	9.10403	11.3886	10.296	9.62662
Ma03_g30740	185.532	432.424	208.221	690.813	444.089	131.29
Ma03_g31370	155.897	182.276	93.5881	208.612	227.701	73.3406
Ma03_g31690	32.2239	19.4334	14.9853	35.0791	13.558	1.42543
Ma03_g31770	250.076	395.296	304.905	507.402	430.588	201.334
Ma03_g31950	0.850946	0.91191	0.833146	0.999538	1.14595	0.482137
Ma03_g32130	44.6873	49.0296	28.5971	71.0799	40.5278	16.5929
Ma03_g32210	7.5115	8.43047	2.49711	11.222	5.87666	2.3265
Ma03_g32460	16.1664	35.5053	11.2027	20.3173	18.7156	5.88219
Ma03_g32500	21.5387	37.9476	19.5155	43.6956	37.1351	13.7008
Ma03_g32890	129.385	118.225	84.3129	117.155	82.7214	39.1464
Ma03_g33060	1.98814	3.25678	1.42493	1.76174	2.49994	0.46704
Ma03_g33440	2.13318	2.52626	1.23368	2.04033	1.66252	1.04781
Ma04_g00200	1.38863	1.46845	0.154949	1.89415	1.10695	0.28165
Ma04_g00460	1.90027	3.68914	1.39615	5.50607	1.43677	1.05015
Ma04_g00740	82.8016	106.883	52.5018	76.3888	69.6912	33.9311
Ma04_g01130	3.08583	4.02592	2.99543	4.06762	3.17636	2.55966
Ma04_g01620	432.374	614.005	348.985	1267.67	837.947	97.6339
Ma04_g01710	88.9403	99.2249	88.4422	114.145	107.111	67.9176
Ma04_g02100	99.3315	119.538	92.0912	177.904	145.36	64.9887
Ma04_g02360	165.502	188.668	68.3932	185.369	190.475	48.7884
Ma04_g02450	232.065	300.747	69.9961	262.847	202.323	36.0147
Ma04_g02620	21.4662	28.9332	16.1738	43.155	26.5734	14.0765
Ma04_g02980	1.00098	1.49535	0.364018	1.90635	0.527582	0.0232786
Ma04_g03140	1.81286	2.04679	0.722248	4.40131	1.51479	0.743665
Ma04_g04320	40.9546	48.6268	39.5014	66.2258	51.3318	30.3223
Ma04_g04460	12.3753	24.3459	2.72295	37.075	12.6508	0.579518
Ma04_g05260	9.30844	11.1024	8.29556	12.7932	7.20287	5.62803
Ma04_g05550	16.1303	7.82166	3.86555	35.437	24.9031	0.515698
Ma04_g05920	35.1651	38.2609	11.7073	33.6733	24.9689	12.8494
Ma04_g06490	86.0679	146.092	54.0569	135.472	194.052	40.3054
Ma04_g06530	29.236	32.4563	13.36	43.4499	35.4253	7.82636
Ma04_g07230	169.589	150.425	98.2102	238.493	243.763	73.1872
Ma04_g07480	32.471	35.1459	13.3253	33.8769	38.9447	13.3441
Ma04_g07720	0.68679	1.01608	0.16664	0.991239	0.704046	0.0501333
Ma04_g07880	1.13264	1.14047	0.75681	1.13715	1.19211	0.725413
Ma04_g08160	235.049	258.538	201.294	328.667	255.189	121.882
Ma04_g08280	558.214	612.001	197.756	577.132	362.245	75.0301
Ma04_g08470	55.8742	76.6427	48.9427	60.9096	83.2112	39.5558
Ma04_g08630	6.5096	9.06509	7.19812	11.1413	7.67619	3.91806
Ma04_g08810	60.7479	58.384	33.2126	59.8409	56.5013	32.977
Ma04_g08880	4.06404	12.2241	4.71528	9.30175	7.86109	3.34222
Ma04_g09790	10.4286	21.447	6.48739	15.1607	15.8554	3.83256
Ma04_g10200	23.4301	30.9024	22.0507	37.8335	26.3937	15.8399
Ma04_g10370	25.2501	40.7926	17.0572	49.6083	28.6828	3.06104
Ma04_g10390	14.8373	19.0382	11.417	15.3957	14.4961	9.95345
Ma04_g11540	65.5456	85.2605	48.7526	70.5568	62.4296	46.026
Ma04_g11750	340.93	487.421	275.709	569.783	548.809	196.746
Ma04_g11940	35.7305	60.5563	30.4293	53.2092	32.168	27.9958
Ma04_g12050	9.4243	16.9344	5.91187	11.5174	8.92107	3.36539
Ma04_g12190	18.904	19.3084	16.6137	27.9215	18.8582	11.3858
Ma04_g12290	13.3284	16.9133	7.54442	22.497	16.0363	6.99865
Ma04_g13180	30.1088	30.928	26.4882	32.7704	34.8863	22.2678
Ma04_g13450	3.2921	3.11581	1.18321	5.55538	4.0866	0.370298
Ma04_g13580	80.2474	84.7664	47.3203	75.489	68.8036	38.587
Ma04_g13950	37.2848	40.8575	30.349	110.543	50.6116	8.10619
Ma04_g14180	1.22639	1.49151	0.941528	0.911278	0.949655	0.223187
Ma04_g14250	14.0444	14.1309	11.786	18.9307	13.4592	10.8123
Ma04_g14500	5.54786	7.90969	4.34388	9.98193	4.48986	1.32447
Ma04_g14750	25.8119	35.5471	27.0077	57.4548	34.2896	7.99418
Ma04_g15290	23.4761	26.9008	19.7217	27.5723	15.6463	10.1596
Ma04_g15370	71.1915	73.2623	43.5188	77.5984	115.203	7.77541
Ma04_g15560	33.2838	32.9509	14.5363	42.4372	23.9858	12.2959
Ma04_g16060	442.678	672.691	237.022	854.654	733.445	197.92
Ma04_g16070	33.6288	16.8796	10.9118	43.5773	26.9249	7.11043
Ma04_g16530	268.073	420.449	194.355	796.637	479.66	100.439
Ma04_g16600	15.3606	25.0526	19.0014	36.1128	11.0003	5.95063
Ma04_g16610	28.166	31.7711	26.1676	38.1826	31.1946	21.9771
Ma04_g16690	9.7509	12.6344	10.2999	16.0143	10.2575	6.63633
Ma04_g16950	1.63419	3.06242	1.15212	2.29695	0.948826	0.447562
Ma04_g17240	2002.88	2826.94	790.103	2363.27	3543.74	438.533
Ma04_g17370	24.6523	29.9566	19.3397	40.4158	21.4892	8.24391
Ma04_g17540	94.2151	83.8932	54.2654	111.137	88.6831	59.2088
Ma04_g18010	204.958	126.503	108.659	316.815	116.558	23.1519
Ma04_g18250	71.34	78.0996	61.618	127.118	90.9567	44.0086
Ma04_g18880	3.55867	3.40233	1.6806	3.76268	2.88557	1.36708
Ma04_g18900	24.3359	26.0619	5.74995	16.3472	10.245	0.91788
Ma04_g19100	6.18113	9.4891	7.08599	8.73181	8.17821	3.05873
Ma04_g19890	26.6818	29.9795	20.2548	41.5546	29.8951	20.2584
Ma04_g21490	43.1569	68.032	24.6525	95.7628	67.4979	23.0562
Ma04_g22290	1856.2	3246.49	824.818	2559.51	4601.84	547.409
Ma04_g23050	71.1514	52.558	32.8573	107.041	61.226	22.0015
Ma04_g23250	12.1862	13.6676	11.4206	19.4783	13.8172	6.53828
Ma04_g23480	22.8549	40.2775	20.7832	39.431	51.378	8.45877
Ma04_g23810	25.3781	34.0303	23.174	29.3581	30.9842	20.2802
Ma04_g24900	572.302	744.98	400.042	658.898	559.479	346.725
Ma04_g25100	229.923	371.766	178.783	370.956	383.608	104.229
Ma04_g25260	5.3172	5.71758	2.93965	21.3412	6.44468	1.27692
Ma04_g25930	41.9106	69.5506	31.6196	46.9655	35.1113	25.9281
Ma04_g26400	56.0817	64.8761	18.4926	94.6523	40.1252	9.04689
Ma04_g26610	23.1651	25.8228	22.3834	26.195	22.5917	19.4385
Ma04_g28050	22.6832	32.8223	19.0753	34.0586	31.4973	18.3757
Ma04_g28190	39.1381	44.7952	9.88182	60.0384	44.3133	5.73667
Ma04_g28220	6.47323	6.46539	4.82788	9.82151	6.95157	4.13536
Ma04_g28280	6.17945	6.3802	3.91738	7.4151	2.66357	1.34014
Ma04_g28320	4.07167	3.92515	3.80392	4.87187	3.41663	2.65726
Ma04_g28440	265.665	281.06	180.536	413.502	426.365	107.503
Ma04_g28820	120.819	232.881	115.691	193.814	168.461	70.8246
Ma04_g29330	84.8232	92.4392	49.8991	172.311	73.1433	42.2466
Ma04_g29340	1.12685	1.60588	0.975074	2.01489	1.36001	0.985028
Ma04_g29690	122.519	256.702	148.632	621.947	218.28	45.3699
Ma04_g30050	4.89794	4.86794	0.508666	7.14113	3.61172	1.10166
Ma04_g30470	79.1974	61.7149	28.5587	106.578	116.043	14.2419
Ma04_g30570	21.9095	26.5612	18.909	29.8822	38.0515	9.80913
Ma04_g31740	123.126	214.919	95.9595	246.654	272.652	77.6236
Ma04_g32160	17.8351	14.5201	14.6156	18.6338	15.1584	9.81128
Ma04_g33070	4.86843	9.74412	4.16969	12.3307	10.0505	1.97086
Ma04_g33310	1.77491	2.01969	1.20522	2.22731	2.08598	1.20611
Ma04_g34890	36.9173	43.0266	35.052	71.3294	26.1312	10.6237
Ma04_g35360	11.5386	15.6675	3.81843	18.4339	9.07775	1.72323
Ma04_g35820	32.565	43.4481	32.8144	47.611	50.1844	22.5096
Ma04_g36720	8.66033	12.9544	9.23301	13.9847	11.0811	6.84077
Ma04_g36970	48.1104	68.3129	36.0646	74.663	46.585	14.0687
Ma04_g37750	102.524	153.002	82.9498	182.006	216.086	52.2881
Ma04_g37850	153.387	219.157	64.1994	119.163	102.528	46.9825
Ma04_g37990	1215.24	989.76	393.767	1911.15	1086.75	214.828
Ma04_g38200	172.771	305.035	95.41	274.253	203.62	43.0952
Ma04_g38720	3.85109	5.84564	4.80423	8.88582	4.72503	2.7056
Ma05_g00070	12.6171	13.0049	8.83156	19.4744	11.8727	6.32077
Ma05_g00730	228.229	256.958	193.506	378.958	343.047	122.187
Ma05_g01090	62.14	75.7021	56.5506	100.626	67.3761	49.3409
Ma05_g01220	191.567	315.427	91.593	155.649	145.793	61.6701
Ma05_g01440	83.9608	100.293	40.5916	102.493	106.117	34.5624
Ma05_g02130	16.2895	16.6484	8.11571	24.1767	18.7952	8.76696
Ma05_g02770	25.0221	24.7438	16.8295	25.7905	17.7393	12.9527
Ma05_g03300	23.8196	26.5839	18.8522	23.4081	22.0768	10.5258
Ma05_g03680	9.42968	9.47858	8.80027	12.8072	11.7528	3.37452
Ma05_g04140	11.7361	11.9392	9.14439	13.0051	11.6408	9.67137
Ma05_g04860	26.8602	33.3065	22.5087	35.3249	27.1453	24.7524
Ma05_g05340	2.61753	3.25727	1.61008	3.51136	2.30306	1.20179
Ma05_g05880	56.5978	67.0193	49.3259	82.8371	52.8373	30.5267
Ma05_g06240	1.32774	1.2947	1.01358	1.5432	1.08405	0.88306
Ma05_g06470	1.34051	5.07722	1.03467	2.32806	0.865151	0
Ma05_g06500	15.9668	80.5963	7.25869	20.8557	23.1349	5.03061
Ma05_g07200	88.3775	97.0835	45.7269	208.175	167.225	22.6167
Ma05_g07350	806.819	1221.26	184.048	1298.14	1161.33	238.511
Ma05_g07550	1090.17	1362.53	495.219	2542.61	1384.12	334.075
Ma05_g07610	39.1043	42.3343	37.289	65.1889	43.3272	25.2923
Ma05_g07800	1288.58	3250.5	945.789	4871.99	3648.61	649.408
Ma05_g08020	58.3215	72.3988	52.2351	75.3796	58.3802	39.3129
Ma05_g08070	1.34043	3.18482	1.24112	2.1661	1.86961	1.05425
Ma05_g08350	3.78832	5.24686	4.57752	7.34573	4.83276	2.95433
Ma05_g08400	35.6704	54.7019	36.9543	41.4749	36.6096	20.3165
Ma05_g08420	639.19	964.629	234.686	786.333	911.946	127.357
Ma05_g08550	1557.67	888.502	419.263	2272.98	936.002	137.032
Ma05_g08660	14.4187	17.4069	7.87281	35.28	8.39742	1.85457
Ma05_g08960	90.3977	150.114	30.193	129.091	39.2572	19.119
Ma05_g08970	392.44	808.077	187.596	714.946	688.871	143.516
Ma05_g09360	454.1	193.672	175.793	937.967	177.994	8.10701
Ma05_g09580	447.002	699.494	401.924	959.736	777.972	244.473
Ma05_g10040	18.686	21.7596	19.0534	22.8878	17.1688	15.4074
Ma05_g10090	732.066	1617.38	268.816	1104.52	836.433	235.006
Ma05_g11030	29.6978	21.7171	17.6144	33.9283	16.8775	8.92026
Ma05_g11810	62.5011	67.3337	62.7813	82.4688	59.3943	30.505
Ma05_g12300	121.617	286.476	22.4023	351.909	174.136	14.1969
Ma05_g12450	85.1328	112.384	62.122	170.474	123.095	54.5355
Ma05_g12630	91.1265	139.828	72.4337	126.217	86.1489	23.5327
Ma05_g12650	38.0129	82.5235	39.0423	93.6579	101.487	9.42999
Ma05_g12670	221.256	306.447	102.063	193.204	243.071	104.619
Ma05_g13330	2.86076	4.10851	2.07137	3.73763	1.17632	0.290837
Ma05_g13580	30.9203	37.4958	16.6469	38.1825	36.0625	17.2415
Ma05_g13800	30.1647	49.7673	27.055	86.5284	29.7631	15.0117
Ma05_g13920	15.3954	15.8942	10.25	36.0956	11.9944	2.90957
Ma05_g14910	2.44854	1.72938	1.07359	2.39747	1.4011	0.465892
Ma05_g15690	162.975	177.474	117.093	610.236	229.115	52.2151
Ma05_g16060	112.432	424.369	58.0929	234.236	110.961	23.8585
Ma05_g17020	22.1373	35.0206	18.2358	25.8567	25.0435	17.6173
Ma05_g17620	678.755	805.304	170.722	771.057	564.31	104.99
Ma05_g17970	0.793272	0.591774	0.0336139	1.23724	0.712041	0
Ma05_g18530	293.795	157.362	102.086	316.119	246.923	23.155
Ma05_g18750	46.2925	54.3438	43.6409	62.8815	68.0968	29.9656
Ma05_g19040	9.81484	14.1913	8.00004	15.4242	8.38296	6.79498
Ma05_g20750	10.6667	13.5838	6.85029	8.40264	8.77585	1.07458
Ma05_g20770	30.7772	31.773	17.9831	43.3831	18.157	15.3123
Ma05_g21200	517.857	628.355	290.994	585.187	310.358	78.2016
Ma05_g21270	425.798	207.563	125.587	562.137	360.124	39.4557
Ma05_g21280	68.709	91.2886	39.8179	111.749	86.2165	36.7557
Ma05_g21290	3.24243	2.69546	1.12708	6.60278	2.22328	0.398657
Ma05_g21390	28.3076	35.8549	18.449	38.3073	26.2348	21.0144
Ma05_g21880	224.672	295.808	98.9827	134.464	409.463	30.259
Ma05_g22010	11.9041	58.721	11.081	79.2451	113.762	0.529467
Ma05_g22220	4.54659	7.5535	3.81199	5.2013	3.43893	1.71236
Ma05_g23440	194.638	290.434	100.879	331.379	308.21	70.9418
Ma05_g23500	17.268	23.849	15.6655	56.9516	23.5822	6.01802
Ma05_g23740	31.2696	29.2932	25.4584	39.3493	31.6685	13.2279
Ma05_g23760	386.143	374.171	114.234	649.974	334.867	70.9259
Ma05_g23900	75.2168	99.935	77.7506	114.154	92.684	54.8862
Ma05_g23990	20.8751	28.263	13.1495	30.0421	27.7121	13.6675
Ma05_g25730	23.8285	24.284	17.9981	23.0847	27.0729	16.341
Ma05_g25780	8.54024	7.81302	5.38101	7.84913	7.69731	3.98318
Ma05_g25960	7.22742	9.8227	6.75213	10.8838	6.3222	5.69384
Ma05_g26220	1.179	1.1743	0	1.83802	0.361815	0
Ma05_g26550	10.1099	16.1917	7.54586	18.7715	19.989	3.32227
Ma05_g27260	159.901	196.436	133.119	217.308	177.261	93.4408
Ma05_g28540	61.0363	61.4076	48.602	76.0461	63.9374	52.6666
Ma05_g28710	63.2251	59.597	25.6693	80.8139	59.9254	24.3722
Ma05_g28720	8.69449	8.81408	8.12308	8.46832	7.02678	1.92094
Ma05_g30150	20.0377	19.393	18.7232	25.3279	26.9288	9.39305
Ma05_g31100	141.987	201.877	58.3082	439.875	169.238	22.4794
Ma05_g31280	4.94399	5.04581	1.96377	3.70489	4.64151	1.63
Ma05_g31490	2.50557	3.0165	1.57439	3.50749	2.92204	1.43112
Ma05_g31550	150.291	227.616	94.0101	303.521	426.902	42.9983
Ma05_g31860	1.18183	3.00714	1.60782	2.26749	2.31161	0.577377
Ma05_g31910	332.912	162.526	170.504	489.126	364.348	39.5224
Ma05_g32050	1.2864	1.63505	0.34212	1.89893	0.739975	0.413333
Ma06_g00690	38.0091	51.7358	40.0173	57.9831	57.8602	30.8275
Ma06_g01420	32.0179	46.6245	21.9004	43.1289	20.8488	6.12985
Ma06_g01430	1.07181	2.56974	2.30332	2.80996	2.50044	0.233142
Ma06_g01470	754.207	778.649	482.347	1285.29	373.499	145.378
Ma06_g02200	12.6627	10.87	5.64859	29.8539	6.89104	2.35275
Ma06_g02320	8.97049	15.475	6.54804	13.6696	12.0447	3.69938
Ma06_g02630	14.0477	12.8179	5.41382	21.7793	7.02397	1.88135
Ma06_g02830	1.15784	1.00187	0.489226	0.701692	1.12942	0.135663
Ma06_g03820	193.589	66.5547	53.2904	178.362	123.723	4.28458
Ma06_g03950	168.069	135.953	82.6094	346.853	114.906	28.4702
Ma06_g04330	180.143	247.064	87.9862	223.638	142.631	72.9395
Ma06_g04510	170.138	172.307	113.347	244.069	146.531	42.0365
Ma06_g05210	6.41938	6.87178	6.17658	7.11133	6.07156	5.95099
Ma06_g06010	10.7804	22.6173	7.87833	15.479	9.55308	3.87229
Ma06_g06040	110.559	158.917	56.7081	204.532	65.7765	32.9916
Ma06_g06230	45.6701	53.749	38.7382	51.5223	31.93	21.3913
Ma06_g06720	146.681	198.992	183.825	460.065	313.456	49.1451
Ma06_g06770	45.6511	45.6662	39.3209	49.1058	41.3127	27.0748
Ma06_g07000	28.4892	54.2291	38.0419	54.6252	45.1837	10.9069
Ma06_g07010	20.935	40.1374	16.7274	57.218	33.394	7.11148
Ma06_g07060	8.52508	7.60881	6.7484	10.2919	7.97944	5.73109
Ma06_g07210	15.2971	10.6223	5.2588	21.6344	7.50202	0.706204
Ma06_g07590	271.241	395.313	219.67	528.178	537.814	170.4
Ma06_g08060	27.2214	31.7067	25.2637	51.9957	35.1483	18.1452
Ma06_g09320	1134.81	3207.49	958.383	2351.8	870.674	370.451
Ma06_g09590	1.39241	2.39973	1.78373	3.92798	2.22589	0.0834352
Ma06_g09790	14.2989	25.8568	4.98289	18.1641	26.5492	3.02364
Ma06_g09800	0.985183	1.87458	0.498009	2.13339	0.583544	0
Ma06_g09940	6.26854	8.42115	6.03378	12.7607	9.18547	4.67302
Ma06_g10280	5.7916	17.4843	6.33504	14.7353	12.9417	2.62368
Ma06_g11200	31.4025	16.1765	8.25548	37.9652	15.8524	3.32078
Ma06_g11370	26.14	39.547	32.0023	62.4175	54.5193	10.5379
Ma06_g11690	142.198	264.538	132.117	316.262	348.362	88.6859
Ma06_g12220	33.3204	19.3125	14.0756	68.2997	28.1798	8.69005
Ma06_g12450	2.40039	3.4011	1.76961	3.28181	1.97446	0.887898
Ma06_g12460	2.77944	4.15245	0.50811	5.40225	2.53138	0.726914
Ma06_g12530	28.812	31.373	27.123	28.3701	34.2508	20.4022
Ma06_g12550	379.893	735.067	240.53	528.365	217.703	132.242
Ma06_g12660	287.567	605.833	331.147	612.928	164.958	24.1099
Ma06_g13030	77.1718	110.784	54.9498	146.301	166.532	37.8438
Ma06_g13290	443.425	427.809	158.495	461.433	386.748	181.118
Ma06_g13310	13.3425	12.9056	13.0475	14.6932	10.4508	3.74381
Ma06_g13510	523.462	1381.41	356.027	1144.36	1209.74	263.743
Ma06_g13920	9.33411	9.56663	8.98726	12.4062	9.09441	6.53069
Ma06_g13940	188.2	385.95	236.134	353.309	322.937	99.6924
Ma06_g14140	66.7269	73.9046	49.3217	131.315	96.5884	29.7014
Ma06_g14410	92.8103	97.8427	11.1533	40.5037	52.0261	8.28899
Ma06_g14510	4.39933	5.71245	3.81701	9.10427	4.70195	3.57902
Ma06_g14520	6.60292	17.1628	2.52765	9.86343	8.04304	2.96258
Ma06_g14930	15.3023	35.0378	8.83052	14.5952	22.3685	6.73913
Ma06_g14950	190.735	344.027	143.451	309.476	276.995	129.893
Ma06_g14960	4.33419	9.04495	2.53772	3.81035	4.54519	1.56437
Ma06_g15250	44.1312	27.8226	9.29932	56.6432	26.4271	7.93715
Ma06_g15360	6.70747	8.09776	2.60946	6.50805	5.34375	3.19617
Ma06_g15620	18.3968	16.3238	12.6252	23.2521	18.2081	8.39087
Ma06_g15810	20.94	27.7721	4.95055	22.3988	9.04779	6.12951
Ma06_g15870	0.577432	0.473313	0	1.30427	0.647939	0
Ma06_g15920	52.6044	78.4281	43.5524	99.1944	75.4883	35.1643
Ma06_g15990	278.439	203.125	63.5288	485.251	302.017	83.0002
Ma06_g16330	29.8335	37.3994	11.0691	29.9528	35.4648	11.4563
Ma06_g16360	87.5693	209.055	53.6878	151.649	146.763	26.8298
Ma06_g16400	30.6291	34.7283	16.062	31.4116	13.6696	10.4905
Ma06_g16840	105.55	102.647	76.2361	150.687	81.6274	61.8026
Ma06_g16910	80.5897	79.1724	26.9555	71.9741	30.4404	15.1519
Ma06_g17030	44.2564	48.6822	18.426	35.0696	26.251	13.4002
Ma06_g17400	67.868	73.8883	70.0472	88.4902	88.8445	44.3315
Ma06_g17770	49.7233	72.949	47.3962	89.4043	87.6788	22.9227
Ma06_g17860	20.9204	20.9677	18.9496	23.1157	20.2179	16.0055
Ma06_g18090	11.6144	16.1118	11.9862	19.3518	17.2872	6.61813
Ma06_g18270	69.9422	456.856	34.035	68.1927	120.841	8.10887
Ma06_g18320	20.0076	19.2183	14.7423	25.0706	19.0729	14.4351
Ma06_g18500	74.3178	161.244	44.4009	177.977	110.187	7.1204
Ma06_g19100	24.68	63.5001	29.9348	42.9196	47.9634	8.7366
Ma06_g20420	28.3596	19.5964	13.6995	20.4295	29.2997	3.34224
Ma06_g20460	212.47	270.462	160.819	499.655	351.338	38.441
Ma06_g20570	19.0643	16.9823	11.5199	21.9462	16.6692	7.64864
Ma06_g21660	31.8115	44.968	39.7246	50.2093	47.4812	19.102
Ma06_g21860	6.73502	8.16855	4.5813	10.07	3.99585	0.619934
Ma06_g21990	26.507	27.5914	15.6796	31.8113	20.0842	10.333
Ma06_g22050	0.769532	4.00337	0.775587	2.26282	1.3167	0.378719
Ma06_g22240	2.12938	2.16973	2.13242	2.26827	2.00995	1.64969
Ma06_g22260	13.6439	24.8153	9.52611	15.8456	18.3245	8.20777
Ma06_g22730	25.9326	26.5547	21.4158	26.4134	34.8744	15.9066
Ma06_g22800	44.1962	45.4712	22.2895	41.1843	28.016	18.7523
Ma06_g22810	15.0905	16.7081	7.22767	15.4543	10.6526	8.0954
Ma06_g22820	33.483	35.6054	23.1435	40.3883	36.0779	14.2946
Ma06_g23250	13.8396	18.8233	13.6758	25.1836	24.8682	7.76676
Ma06_g24030	23.2107	26.3622	23.8316	30.6348	25.5531	21.489
Ma06_g24040	82.4231	87.1096	80.7608	99.4824	83.0759	72.359
Ma06_g24120	9.58023	10.5042	2.97615	19.7134	8.9937	2.92148
Ma06_g24130	0.828933	0.609093	0.113364	1.43885	0.491649	0.093783
Ma06_g24260	1.2676	2.0005	1.47841	3.00678	1.26524	0.486629
Ma06_g24590	1.34491	2.72838	0.993256	1.71357	0.794131	0.428357
Ma06_g25210	12.116	11.7852	6.18085	11.0358	18.5435	2.38243
Ma06_g25460	4.24474	6.45322	4.07555	5.39008	8.03714	2.34916
Ma06_g26080	10.7887	22.3165	11.028	36.2436	23.7404	3.0162
Ma06_g26160	7.50193	16.3937	9.16324	19.8831	12.917	2.73434
Ma06_g26760	10.7113	18.8091	5.86164	21.3758	13.1752	6.53292
Ma06_g26790	154.147	222.103	112.003	299.397	181.246	97.8222
Ma06_g27470	19.4704	30.3649	1.22848	11.5815	14.2747	2.00587
Ma06_g28270	18.848	26.1964	18.5105	33.8309	27.7464	11.1189
Ma06_g28740	7.5968	10.0319	8.46183	10.9294	7.86328	4.04771
Ma06_g28750	278.671	851.396	107.56	451.299	764.607	84.1963
Ma06_g28770	33.6735	42.4391	8.96041	27.2062	11.5463	5.45576
Ma06_g28880	32.6921	50.1826	22.3873	80.5558	21.7161	11.6683
Ma06_g29410	89.5552	103.394	69.8032	109.416	106.42	62.7241
Ma06_g29740	3.13539	7.88242	1.04291	4.02312	2.87572	1.05444
Ma06_g29930	12.7271	15.1726	9.13864	19.7568	15.134	8.91998
Ma06_g30250	1.06381	1.61625	1.08385	1.73608	1.4968	0.716654
Ma06_g30360	41.5656	34.7316	25.2956	51.8226	26.3896	18.6407
Ma06_g31570	38.1136	102.424	38.9155	49.1297	32.2617	1.26515
Ma06_g32040	11.6598	11.5248	10.2507	12.3595	10.595	5.60684
Ma06_g32090	88.3593	117.966	74.5186	109.432	117.057	57.3468
Ma06_g32560	66.441	132.566	49.59	586.352	169.637	6.4972
Ma06_g32700	223.903	249.637	34.5191	122.255	115.837	33.1938
Ma06_g33200	11.1212	16.7198	2.06247	6.00434	3.6884	0.446499
Ma06_g33310	54.9827	68.382	44.7655	61.4271	82.4327	35.9617
Ma06_g34430	52.1698	52.5958	15.4824	42.4081	30.4853	14.6373
Ma06_g34440	50.0337	51.2626	29.3087	62.565	40.1703	22.4806
Ma06_g34580	145.584	108.926	74.7602	178.756	124.785	77.8069
Ma06_g34900	1.16236	1.9001	1.32905	2.06674	1.05633	0.300972
Ma06_g35120	3.13095	12.5317	2.3413	11.4352	2.20787	0.835869
Ma06_g35130	4.89748	12.8093	2.42064	6.5375	6.93259	1.46348
Ma06_g35810	66.2454	96.8033	46.1333	148.127	145.683	30.6871
Ma06_g35820	1027.28	2247.35	643.876	2197.52	1128.31	671.066
Ma06_g36050	25.5821	19.2638	9.13105	27.3897	19.3717	7.27568
Ma06_g36160	630.509	470.436	183.139	691.663	617.89	167.929
Ma06_g36170	204.418	209.156	130.072	330.748	330.543	101.153
Ma06_g36550	29.4985	54.2294	18.2126	44.7193	42.1866	17.8607
Ma06_g36860	12.9252	13.5123	11.2906	14.3097	15.5876	7.36572
Ma06_g37330	15.7252	17.5075	14.9417	23.6723	17.1818	12.2465
Ma06_g37430	6.79939	7.55843	6.42276	8.18029	5.30165	4.48453
Ma06_g37500	34.2348	43.7492	38.3387	66.934	48.3842	24.5995
Ma06_g37830	0.937484	1.06248	0.860014	1.22348	1.64002	0.352644
Ma07_g00240	21.2832	25.3667	7.57222	25.2318	44.6318	4.65334
Ma07_g00540	41.3024	65.091	43.6447	63.8304	58.7419	30.1956
Ma07_g01230	34.4446	30.8099	17.8655	20.9887	17.341	2.02151
Ma07_g01440	649.672	1528.32	254.074	1129.54	640.227	132.941
Ma07_g01560	2.92297	2.73267	1.64935	2.93334	2.93639	0.869578
Ma07_g02100	39.7458	74.0484	29.8254	140.074	20.1064	3.4928
Ma07_g02160	46.4143	47.1736	23.4303	28.8904	25.8053	10.9682
Ma07_g02270	85.1463	71.8364	70.7884	103.233	86.913	50.4898
Ma07_g02530	2.29723	2.07521	1.5548	3.46732	1.06158	0.447235
Ma07_g02580	19.2248	27.2859	11.9383	40.1628	21.9162	12.0884
Ma07_g03070	20.3987	32.181	10.0137	52.3709	29.03	12.7981
Ma07_g03220	67.6421	221.293	56.4293	86.1789	160.575	24.5534
Ma07_g03380	142.914	97.3445	69.9732	218.352	44.7598	6.64305
Ma07_g04170	3.69918	5.97541	2.21505	5.08647	4.54583	2.37676
Ma07_g05130	4.85226	7.54082	2.6701	6.919	3.09817	1.35314
Ma07_g05140	1.10938	5.14469	0.597619	2.20289	2.25914	0.199594
Ma07_g05310	3.0115	9.59496	4.68922	8.74741	9.96597	1.68994
Ma07_g06150	78.8464	104.919	36.1692	116.845	60.9077	47.5442
Ma07_g06430	17.0342	19.9763	17.0507	21.2292	17.6885	12.8813
Ma07_g06580	21.347	29.5459	22.5335	28.236	22.2211	14.4772
Ma07_g06700	32.4629	40.2832	29.7296	70.5652	23.4111	6.34958
Ma07_g06930	0.919146	1.67407	0.649253	1.70269	0.567895	0.0845493
Ma07_g07620	3.85003	4.78324	3.57986	4.10239	3.88117	3.41903
Ma07_g08080	5.59883	7.91	7.11205	7.81334	4.01381	0.503307
Ma07_g08190	71.2876	90.9034	57.3724	79.7293	55.7361	49.7759
Ma07_g08220	26.1967	33.894	26.2936	47.7041	19.8285	14.2613
Ma07_g08270	22.8087	26.1765	9.33089	31.3462	29.2845	6.2678
Ma07_g08400	483.107	504.706	101.891	358.609	227.615	95.3435
Ma07_g08710	5.68402	7.89385	4.53236	7.2455	5.3117	4.6181
Ma07_g09530	110.014	226.396	52.1162	160.568	175.598	38.4687
Ma07_g10380	4.65123	3.6126	2.33782	7.64004	2.71835	0.576312
Ma07_g10700	1.99947	3.47096	2.27794	2.94797	3.41347	1.22464
Ma07_g11380	14.3864	22.3946	13.1634	15.4362	10.2159	4.60233
Ma07_g11390	100.511	110.428	81.3334	116.514	86.5352	34.1927
Ma07_g11450	0.890088	1.14405	0.506423	1.62989	0.374241	0.169536
Ma07_g11610	175.924	301.839	126.174	422.053	274.683	88.1328
Ma07_g12270	142.353	136.824	61.1815	200.959	213.659	29.3362
Ma07_g12850	2.22059	2.17259	1.03563	5.71557	1.13227	0.212178
Ma07_g13530	44.3039	63.6227	44.2856	65.8398	60.4527	40.6568
Ma07_g13980	46.8159	71.2181	52.7572	67.8228	49.7751	35.6346
Ma07_g14430	119.647	160.593	89.4088	156.572	112.969	86.9795
Ma07_g14970	153.614	95.3943	45.681	257.647	98.4388	31.0077
Ma07_g16020	9.00789	6.93622	1.79108	9.12238	3.23228	1.24012
Ma07_g16310	9.78624	7.66914	2.8433	43.1932	13.8326	2.02749
Ma07_g16620	1.50432	1.33062	1.0364	1.7661	1.5142	0.151904
Ma07_g16810	37.7596	51.8056	26.19	49.2997	48.8041	25.5694
Ma07_g18310	598.918	678.858	361.739	898.305	1187.62	190.383
Ma07_g18380	88.6343	123.126	37.6688	212.587	229.145	35.5627
Ma07_g19200	157.323	314.172	152.834	235.475	218.007	110.097
Ma07_g19550	2.83266	4.53426	0.801327	3.1962	2.76966	0.476543
Ma07_g19670	273.768	307.53	195.94	406.718	290.746	228.889
Ma07_g19780	44.3899	45.5048	25.9922	49.5524	52.9138	17.9713
Ma07_g20080	8.49181	10.4417	4.77464	11.5666	13.19	4.64762
Ma07_g20090	141.959	151.158	60.2493	229.493	229.593	40.9505
Ma07_g20150	8.60439	7.56667	6.75668	9.35985	8.1339	5.03778
Ma07_g20900	72.9295	111.085	73.1053	92.7144	97.5309	44.6698
Ma07_g21330	496.784	711.008	214.084	882.25	378.629	172.329
Ma07_g23140	41.905	43.6588	42.2114	54.408	48.4446	32.1444
Ma07_g23250	82.9022	113.653	82.6552	118.637	117.78	72.068
Ma07_g23360	34.9829	40.8982	22.1313	29.3572	21.8608	11.5022
Ma07_g23370	3.207	3.31778	1.0012	2.71323	1.54244	0.82828
Ma07_g23510	150.785	113.606	71.4093	435.682	192.677	23.7353
Ma07_g23720	16.5803	17.4259	12.6994	49.5188	29.6055	4.76702
Ma07_g24270	44.1943	52.1422	39.077	60.969	51.3474	32.7299
Ma07_g25160	37.1495	49.2434	30.2814	56.3356	80.2411	17.5912
Ma07_g25370	364.568	533.227	149.602	518.304	726.529	126.122
Ma07_g25460	15.6225	25.9108	23.2395	44.8212	22.4885	6.58075
Ma07_g25880	6.65659	7.37526	1.40651	7.67524	3.86284	1.1074
Ma07_g26770	91.8736	105.718	71.669	142.375	104.704	42.2422
Ma07_g26920	129.845	213.787	82.6667	181.791	127.567	63.5995
Ma07_g26940	107.517	180.069	73.9368	162.886	148.027	55.5182
Ma07_g27430	219.671	333.855	220.497	533.014	404.24	66.3401
Ma07_g27660	366.252	372.146	199.412	257.366	319.632	118.028
Ma07_g27760	5.46486	6.96355	4.00602	5.66978	6.87501	2.94765
Ma07_g28270	955.311	792.15	505.048	1470.23	1255.32	299.979
Ma07_g28450	1461.63	2142.29	1518.93	3325.99	2262.2	677.218
Ma07_g29010	74.8229	124.361	23.1036	43.0627	76.5784	14.2121
Ma08_g00210	51.7029	76.2283	34.9759	77.2172	53.1034	36.8032
Ma08_g00430	52.8341	84.0272	53.9012	69.2257	92.7917	35.0898
Ma08_g00550	31.7501	58.5064	11.3695	51.3725	27.0081	15.0725
Ma08_g00560	56.3548	94.0951	21.4346	101.402	51.9052	20.2291
Ma08_g00800	4.49506	7.47579	3.81285	6.42506	5.4144	3.55645
Ma08_g00810	6.00748	5.49374	4.6324	6.22603	5.22277	3.82384
Ma08_g01140	538.252	557.73	390.351	1320.57	368.998	120.409
Ma08_g01430	757.604	1138.73	305.121	738.266	632.716	285.725
Ma08_g01450	313.383	595.132	138.942	522.834	427.097	147.524
Ma08_g01530	54.3592	69.6115	42.1037	150.014	87.1039	27.8295
Ma08_g01540	67.0083	108.157	79.3779	121.654	35.3862	10.7936
Ma08_g01800	48.619	47.6886	24.2285	147.442	49.5269	10.7815
Ma08_g02190	252.51	318.664	90.4939	370.929	496.658	58.7415
Ma08_g02320	141.569	261.829	108.503	327.378	173.942	58.6947
Ma08_g02510	33.5963	77.7127	37.7137	73.0118	73.9011	25.1084
Ma08_g03000	32.7922	36.5714	32.598	34.3426	37.4891	29.3966
Ma08_g03130	21.693	48.5629	6.81189	23.9376	16.9236	3.56641
Ma08_g03230	1.21424	1.43093	1.08371	1.63813	1.44691	1.09245
Ma08_g03450	2.7286	2.64703	2.22638	2.79222	2.20539	1.89824
Ma08_g04510	5.7782	8.26113	5.85634	8.62417	6.82464	3.86095
Ma08_g04770	55.2002	61.2348	53.34	69.5626	55.9168	52.3427
Ma08_g05320	273.513	376.38	89.987	397.508	143.005	67.0559
Ma08_g06480	40.3853	36.3641	22.707	57.3314	44.3333	20.169
Ma08_g07200	74.6998	54.9425	54.9984	103.726	81.3423	27.6741
Ma08_g07450	70.6275	78.3536	60.9147	87.2577	124.199	37.7781
Ma08_g07480	37.6214	29.7302	18.05	70.0728	33.1166	8.55637
Ma08_g07880	87.7596	127.967	82.8827	163.133	174.83	52.5749
Ma08_g08160	1.95535	4.89761	1.87032	4.62588	2.24448	0.589413
Ma08_g08270	15.3474	22.2546	11.5601	38.0806	20.4414	8.76436
Ma08_g08320	89.7735	300.724	82.0615	232.154	257.956	48.0496
Ma08_g08340	104.123	187.822	43.029	67.6335	146.75	15.8561
Ma08_g08700	539.103	645.249	224.855	615.782	392.469	123.413
Ma08_g08840	36.5797	20.8538	9.93383	48.1954	14.1422	2.10386
Ma08_g09050	1.26425	0.984525	0.707591	1.50558	1.15735	0.529979
Ma08_g09600	16.8215	22.4809	13.8508	25.9786	23.7034	11.8555
Ma08_g09930	31.7175	41.902	32.7623	53.5439	45.8435	21.5357
Ma08_g09970	52.8277	64.1559	51.2038	70.5452	63.2353	48.8837
Ma08_g10710	18.0922	23.065	10.636	31.5166	23.6587	9.94445
Ma08_g11100	33.3052	39.1249	19.8033	55.5924	41.788	14.7532
Ma08_g11200	7.66427	7.33341	3.74012	8.46321	5.28863	4.25926
Ma08_g11380	3.31891	4.72698	4.12328	4.9141	3.8599	2.88582
Ma08_g11390	76.5427	57.868	45.4151	124.881	67.5332	22.684
Ma08_g12810	3.44587	6.22751	2.37138	5.88616	4.74176	1.00258
Ma08_g13300	2.49669	2.38337	0.852146	2.23482	1.30989	0.642022
Ma08_g13830	7.51649	12.9264	4.30054	17.1166	9.46398	3.10519
Ma08_g15090	172.576	187.782	86.6848	194.983	217.16	47.9418
Ma08_g16290	402.244	418.569	359.474	620.467	643.184	199.003
Ma08_g17360	84.4493	109.795	59.3292	83.1491	75.5774	40.4225
Ma08_g17730	27.2193	41.9788	13.3418	37.0746	47.4632	7.9082
Ma08_g17990	10.1652	12.3749	8.76507	10.8117	8.7614	6.93488
Ma08_g18860	43.7799	46.7105	41.6205	73.3007	40.738	16.4204
Ma08_g18980	23.7376	26.3854	21.3036	29.2854	25.1127	18.5637
Ma08_g19050	62.4675	122.235	73.0235	103.874	90.7593	54.4656
Ma08_g19370	2.62152	7.88649	1.34132	7.2814	7.44135	0.978213
Ma08_g19400	92.7478	75.4024	48.5798	107.083	96.9433	33.3825
Ma08_g19700	559.33	1027.11	477.602	752.219	738.311	358.839
Ma08_g20070	21.7961	24.0009	16.0278	35.2394	15.2499	8.57638
Ma08_g20180	92.8935	170.783	64.0242	254.721	191.491	39.2081
Ma08_g20490	24.0369	41.0592	29.5519	36.842	24.519	17.9542
Ma08_g20550	65.107	128.574	54.1409	100.325	71.996	20.8381
Ma08_g20880	51.1984	87.0308	43.1702	79.14	70.4089	34.5251
Ma08_g21100	68.5858	68.6135	46.1329	67.9592	41.2264	23.7618
Ma08_g22340	104.689	181.041	88.4356	447.984	256.38	27.3815
Ma08_g22910	3.35459	4.31268	2.18516	3.57369	4.82078	0.21806
Ma08_g23210	17.6526	28.528	18.9102	30.2581	22.5402	5.19955
Ma08_g23240	1048.28	1459.77	627.947	1840.18	1499.06	320.997
Ma08_g23340	45.5078	55.2042	30.9581	70.5928	39.3875	33.1298
Ma08_g23430	5.65445	7.3568	5.12327	6.78244	9.30477	3.96026
Ma08_g23500	6.62606	9.91512	4.62557	9.94822	10.033	3.45558
Ma08_g24360	15.8099	21.4398	10.8929	27.9888	24.751	9.8939
Ma08_g24380	1.26018	0.772314	0.25822	2.80794	1.30327	0.211861
Ma08_g25200	3.63694	4.00511	3.14954	3.82905	3.31188	2.73786
Ma08_g25350	3.44882	5.49517	2.76885	4.77937	2.38004	0.852641
Ma08_g26110	0.628248	1.38874	0.30414	0.632249	0.808542	0.110187
Ma08_g27140	0.940976	2.12276	1.03418	2.09259	1.25207	0.743961
Ma08_g27150	39.5052	86.9978	76.7956	140.161	100.438	16.4311
Ma08_g27350	62.344	75.4299	13.7887	97.5916	73.6366	18.9035
Ma08_g27850	55.063	68.4314	62.9284	89.1331	69.3766	45.365
Ma08_g28120	0.642245	2.46897	0.617417	1.42031	0.678286	0.112071
Ma08_g28130	16.3257	18.9469	14.4274	19.0138	13.8389	12.0673
Ma08_g28170	170.765	172.581	115.083	625.677	246.905	16.1802
Ma08_g29030	19.0661	41.1067	8.70016	36.1396	17.7908	4.04551
Ma08_g29420	11.5747	14.1348	9.24048	14.2643	10.8946	9.35921
Ma08_g29600	41.17	52.176	36.0914	49.9382	55.4032	26.5197
Ma08_g29910	775.836	701.524	215.701	1165.69	481.273	88.4344
Ma08_g29950	17.6195	17.8986	13.9387	18.8983	13.9786	12.4045
Ma08_g30140	15.6884	19.8698	14.7892	17.1906	13.6984	11.4961
Ma08_g32130	49.2174	56.1076	19.5199	55.1036	37.2697	10.4214
Ma08_g32710	6.15495	7.86842	4.60149	7.66749	9.29396	3.0505
Ma08_g32740	6.91654	7.75323	1.56045	6.37096	4.84142	1.24446
Ma08_g33140	89.8043	101.666	64.7892	100.09	74.8826	64.4994
Ma08_g33450	9.85616	13.927	10.1953	19.0421	10.6348	1.76175
Ma08_g33890	45.9235	26.0628	23.1468	55.3523	22.7046	7.84113
Ma08_g34740	101.657	168.356	67.4675	92.8109	88.1966	21.8436
Ma09_g00350	9.47696	12.2953	9.99909	13.2412	11.8236	9.56577
Ma09_g00430	30.3197	37.1309	27.4443	51.1268	38.8716	21.0317
Ma09_g00580	86.6696	53.6263	60.0796	102.005	89.6958	5.27699
Ma09_g01120	779.542	1185.81	428.212	1136.76	1040.16	394.857
Ma09_g01680	83.6968	100.797	70.5065	186.169	110.931	54.1821
Ma09_g01970	84.9208	115.281	38.423	98.5803	54.7549	22.7397
Ma09_g02490	399.471	479.027	220.053	973.462	712.828	93.305
Ma09_g03580	16.1249	49.0582	15.3614	46.2341	41.6695	7.14106
Ma09_g03640	4.33523	5.94285	3.57348	5.88561	3.77063	2.60777
Ma09_g03890	70.9395	98.205	66.0136	109.714	96.4114	52.2411
Ma09_g04370	14.5942	72.0378	7.94986	35.3872	45.2435	3.13753
Ma09_g04710	108.159	74.6979	35.032	310.377	45.1085	2.29774
Ma09_g04960	23.5911	22.9975	7.60756	29.1909	20.236	10.9043
Ma09_g04990	28.9575	34.4041	10.8025	54.3122	38.8629	13.6537
Ma09_g05040	17.158	17.5097	11.5941	22.3016	19.311	7.7904
Ma09_g05170	25.8016	34.2206	7.92971	22.6055	15.738	8.1791
Ma09_g05180	397.53	376.526	256.645	447.898	529.358	246.727
Ma09_g05650	13.5257	35.727	7.16024	15.9834	13.6263	4.83385
Ma09_g05960	7.0989	13.0967	8.59624	11.4763	5.84524	1.85027
Ma09_g06270	146.795	198.576	109.629	250.089	193.112	82.7786
Ma09_g06350	46.8111	101.136	29.1649	52.8453	85.6361	23.4531
Ma09_g06800	25.0394	25.1473	11.8567	30.4217	19.1349	11.2707
Ma09_g06870	1.9521	2.2818	2.05403	2.2268	2.76918	1.25655
Ma09_g06980	487.651	1028.26	233.432	1003.24	1016.6	157.028
Ma09_g08580	24.6541	25.9894	24.0853	26.4954	23.5151	22.1876
Ma09_g10270	53.7437	118.339	60.7096	85.3266	51.724	14.4762
Ma09_g10300	6.69295	6.88149	5.45794	8.75446	4.99051	3.87469
Ma09_g10830	3507.74	4606.09	1696.31	4160.96	6012.54	1270.75
Ma09_g10840	2785.49	3393.89	1203.68	2805.55	2729.55	946.848
Ma09_g10890	283.161	376.591	138.784	526.46	619.149	72.3945
Ma09_g10990	45.6232	54.2534	31.9233	44.1222	26.5883	10.0671
Ma09_g11140	4.23783	9.79491	4.8179	10.0548	4.62395	1.71414
Ma09_g11840	119.704	240.811	119.842	260.734	184.679	49.1482
Ma09_g11880	98.5012	254.24	33.5473	81.4494	177.853	24.2718
Ma09_g12170	3.2403	2.26784	1.77768	3.15271	3.98545	0.901752
Ma09_g12240	418.992	146.141	122.277	795.079	214.032	12.364
Ma09_g12320	15.6918	14.7475	8.45919	22.512	18.1705	8.73323
Ma09_g12330	58.337	44.468	37.7241	73.5479	62.9078	23.7641
Ma09_g13190	16.0839	34.0764	14.6888	26.0084	12.0672	5.80093
Ma09_g14150	23.7254	24.2015	14.6112	72.5468	17.3763	5.18601
Ma09_g14490	16.8366	15.6084	10.2787	32.4542	19.0037	7.2788
Ma09_g14720	254.472	289.466	200.489	619.499	341.845	120.176
Ma09_g14750	83.2183	156.234	79.3047	96.9144	64.2617	35.5667
Ma09_g14760	0.271604	0.751899	0.0511855	1.00454	0.259547	0.0602044
Ma09_g14900	38.3078	129.711	58	356.304	104.01	4.53641
Ma09_g15570	13.0985	18.5955	9.83908	19.2399	17.4881	8.87823
Ma09_g15730	2.9417	4.85218	2.43387	5.13699	5.29591	1.40776
Ma09_g15840	2752.66	3418.48	2405.08	3972.14	1964.45	1131.53
Ma09_g16130	2.15648	1.5162	1.51059	2.66066	1.69152	0.30936
Ma09_g16840	7.48387	6.51322	5.85992	7.79459	5.55449	4.42775
Ma09_g17210	130.126	166.51	130.719	203.294	189.118	73.2969
Ma09_g17250	28.6728	30.0598	25.2689	32.7166	33.1571	24.5366
Ma09_g17310	53.3307	116.639	33.6894	76.1612	23.0759	10.9507
Ma09_g17330	2372.71	2151.39	810.647	3009.67	2371.48	689.355
Ma09_g19830	81.8525	145.591	38.0348	69.1641	77.5716	26.063
Ma09_g20150	11.3347	20.3997	14.5459	15.771	10.8332	3.74994
Ma09_g20230	2.84806	3.00265	2.59432	3.91997	2.9794	1.93664
Ma09_g20310	1.88811	2.83845	1.46721	2.19343	3.4997	0.526029
Ma09_g20430	16.9199	28.5634	13.1318	25.1056	18.1	14.7176
Ma09_g21840	24.9108	30.1052	17.247	70.4817	58.8706	5.48218
Ma09_g22190	99.3536	114.773	103.837	103.72	93.5031	47.4417
Ma09_g22320	60.2109	121.425	97.3097	136.577	97.775	44.8279
Ma09_g23330	33.7395	55.2071	31.3269	59.0084	29.5529	18.5861
Ma09_g23440	277.823	460.293	178.514	526.486	535.563	141.401
Ma09_g23650	79.2676	87.4438	79.3767	119.144	132.698	34.74
Ma09_g24220	232.321	103.461	78.6372	231.936	136.79	13.1896
Ma09_g24460	5.40616	6.69417	4.90736	10.9068	5.12281	2.90996
Ma09_g24800	12.1948	13.9686	10.5153	15.9486	9.09034	7.87754
Ma09_g24960	39.9212	40.6061	29.0721	58.8947	27.5343	16.7
Ma09_g25910	25.6371	29.3639	27.5712	45.1649	33.5975	16.3493
Ma09_g26030	201	194.322	122.307	442.325	301.887	52.4059
Ma09_g26060	40.3465	39.8088	33.578	40.3464	41.828	29.071
Ma09_g26490	65.1553	91.9697	49.6773	108.424	52.2187	17.3033
Ma09_g26500	7.3123	13.8555	2.0203	8.89008	21.8499	0.517715
Ma09_g26520	877.436	1499.15	548.953	1071.08	1200.14	169.371
Ma09_g26560	36.7571	54.4386	26.5929	56.4442	62.0072	8.71927
Ma09_g26570	641.072	1195.31	345.561	995.553	735.354	98.7802
Ma09_g26590	390.713	1447.24	284.476	474.685	509.889	78.7256
Ma09_g26630	2.56368	2.27841	2.10805	2.33544	2.45439	1.47981
Ma09_g26880	234.136	448.945	120.993	406.589	345.59	95.4439
Ma09_g26890	82.6783	98.6312	49.5655	151.349	146.827	41.0866
Ma09_g26940	68.7184	81.19	45.3935	87.28	46.4795	21.4176
Ma09_g27390	12.0689	13.0966	10.161	15.697	12.7702	9.2718
Ma09_g27440	1.64508	5.96902	0.945731	4.12231	1.27328	0.183618
Ma09_g27690	299.204	182.351	76.0305	330.712	149.971	50.2417
Ma09_g27700	7.38569	5.85812	1.84267	7.73547	4.04188	0.735617
Ma09_g27930	75.4629	91.3239	39.3015	70.5538	69.0366	34.1323
Ma09_g28380	9.96806	15.3164	13.5283	14.9755	16.6912	6.67398
Ma09_g29260	96.6527	92.864	34.7023	157.627	41.4311	18.5246
Ma09_g29700	10.9424	9.29213	4.20969	8.30068	10.5603	3.36476
Ma09_g29940	5.21651	7.46348	4.68493	6.71635	6.89207	3.90048
Ma09_g30260	61.2903	39.8098	36.5635	95.0251	38.7343	11.0599
Ma09_g30310	39.1837	33.664	28.5392	35.4363	22.483	7.64967
Ma09_g30430	171.956	331.018	181.018	511.657	347.169	62.8226
Ma09_g30670	167.205	442.648	234.305	460.848	300.938	56.7756
Ma09_g30680	74.7862	163.584	88.7942	102.486	144.753	32.981
Ma09_g30690	114.415	228.273	166.283	447.589	218.647	14.9605
Ma09_g31280	2.98237	3.21715	1.52048	4.81694	3.988	1.58332
Ma09_g31370	121.684	172.868	67.193	165.868	100.231	32.4002
Ma09_g31500	32.9869	27.3394	23.3737	38.9095	29.9275	20.8811
Ma10_g01050	0.978886	0.67232	0.661652	1.14996	0.741603	0.360463
Ma10_g01140	4.68245	6.73896	3.52341	5.48672	3.86003	3.20041
Ma10_g01290	5.36985	6.2914	4.05269	7.25481	6.60956	3.95308
Ma10_g02230	38.8191	44.316	39.7945	74.7724	47.2751	24.608
Ma10_g03210	65.185	93.2084	20.9185	82.4775	47.5697	31.8047
Ma10_g03440	153.414	261.274	63.9086	112.127	88.0936	6.50345
Ma10_g03540	15.0414	31.392	19.7745	37.4246	26.8157	12.1301
Ma10_g03840	14.5868	103.205	20.1373	46.0149	32.8755	7.54011
Ma10_g03980	86.2471	211.832	91.1588	128.216	149.503	30.3133
Ma10_g04400	436.096	1506.68	260.64	719.729	687.719	206.254
Ma10_g04510	63.5196	51.7066	32.9662	110.826	76.5911	7.18721
Ma10_g05050	26.9091	35.6562	22.3248	46.5147	49.2302	9.53998
Ma10_g06120	228.74	427.384	149.118	469.835	352.052	64.6909
Ma10_g06370	534.304	317.275	217.933	733.474	294.694	77.0014
Ma10_g06480	18.3827	22.2317	13.7457	24.215	15.7086	10.1679
Ma10_g06490	39.0996	42.1558	32.8755	61.6056	35.1343	26.4591
Ma10_g06510	102.173	108.691	39.0851	168.165	72.0236	26.8856
Ma10_g07110	33.7241	48.002	22.5484	51.5484	27.8978	15.1247
Ma10_g07790	17.5834	17.0567	14.2273	19.4187	14.3577	6.28382
Ma10_g08680	16.3899	12.448	8.49705	14.5338	17.5295	6.09459
Ma10_g08850	34.3464	74.1196	46.3197	102.738	38.0832	6.13935
Ma10_g09650	150.748	195.536	97.4233	273.124	196.474	77.4296
Ma10_g10250	52.3878	63.2052	49.6628	75.8356	68.879	41.6225
Ma10_g10800	60.8211	92.3028	45.6006	104.304	120.803	17.0105
Ma10_g11980	60.9285	45.8885	29.7209	143.658	59.926	13.0323
Ma10_g12810	17.0755	18.2595	16.8969	20.6361	18.4737	15.3859
Ma10_g14030	19.6604	21.221	20.4158	24.014	22.8806	15.9738
Ma10_g14160	20.5824	22.9323	16.8982	20.374	14.6602	6.24665
Ma10_g14230	15.0294	18.581	12.8575	20.7249	11.0072	6.64828
Ma10_g14330	109.209	220.828	94.9311	220.863	209.871	51.7528
Ma10_g14350	6.19898	5.28933	3.25971	7.01471	4.57032	3.31216
Ma10_g15320	19.7168	59.8934	7.43642	22.6898	30.2764	3.1001
Ma10_g15340	5.63321	7.73814	5.70943	8.55149	7.30701	5.36253
Ma10_g15470	18.9879	19.4648	16.683	34.5135	19.2911	12.8972
Ma10_g15770	14.1171	17.5102	11.8279	15.8321	11.1283	3.87896
Ma10_g15800	54.7945	121.152	48.0985	61.2175	72.4418	18.7872
Ma10_g15870	13.5219	22.3555	12.7365	28.0821	22.0122	10.3355
Ma10_g16680	289.426	445.312	152.255	638.151	681.956	97.5382
Ma10_g17540	43.7952	74.6474	48.6947	91.3991	75.5908	38.1776
Ma10_g17630	74.7763	61.8454	43.8418	85.1011	61.7556	39.1812
Ma10_g17750	65.5482	86.1263	52.9203	106.869	119.084	41.1799
Ma10_g18120	116.05	133.958	76.0504	340.137	145.801	18.4712
Ma10_g18140	6.46584	10.3008	6.16106	8.37572	6.52935	1.98952
Ma10_g18150	1.594	3.97161	1.05329	4.75128	1.59719	0.503596
Ma10_g18490	8.17433	10.492	5.05447	10.2613	7.84834	6.0453
Ma10_g18610	87.6626	88.7804	47.493	172.813	29.0451	13.4402
Ma10_g18730	295.804	455.342	99.2634	479.532	566.686	82.6
Ma10_g18970	2270.79	3981.03	2044.1	2770.35	5358.54	745.314
Ma10_g19190	10.6548	8.3393	6.0212	15.4509	13.4	3.87619
Ma10_g19530	8.8595	10.6627	6.8321	10.1002	7.39453	6.06466
Ma10_g19610	3.88888	5.53511	3.85203	5.23256	4.78583	3.48787
Ma10_g19840	20.91	24.5962	18.3402	21.5385	23.2847	17.6071
Ma10_g20200	177.997	716.22	187.826	644.675	322.344	170.353
Ma10_g20560	912.368	1710.53	509.646	2257.8	1439.74	567.3
Ma10_g21060	15.9854	37.4599	20.7797	20.8563	23.9045	4.10126
Ma10_g21090	27.7333	26.1209	23.4118	27.5399	25.0493	19.39
Ma10_g21130	62.5255	99.8409	27.3633	116.269	79.5786	22.2633
Ma10_g21170	118.396	61.0725	62.9836	185.911	96.8267	17.3652
Ma10_g22750	365.493	610.95	241.367	819.763	1054.26	170.387
Ma10_g23240	41.9467	43.8013	14.3952	40.0323	41.0412	11.7581
Ma10_g23300	101.59	98.0628	29.3086	146.416	113.52	22.2868
Ma10_g23310	16.3638	21.0011	13.2409	18.5092	10.6466	7.27371
Ma10_g23560	5.97334	6.86844	0.995984	6.95293	3.68744	0.395895
Ma10_g24400	268.016	433.289	97.0593	326.827	196.586	88.802
Ma10_g24550	132.164	164.859	70.7692	151.135	122.549	64.3033
Ma10_g25000	4.1827	5.66049	2.58077	6.08787	4.0713	2.68832
Ma10_g25150	29.5057	30.446	22.0948	54.3876	39.9282	16.5884
Ma10_g25760	77.11	60.8781	38.7136	116.45	82.0669	24.0288
Ma10_g27070	84.4087	105.192	76.6045	110.434	103.438	72.0805
Ma10_g27270	301.302	337.609	332.002	454.51	419.241	177.011
Ma10_g28330	30.908	32.0551	29.1067	45.471	36.9006	22.1299
Ma10_g28470	28.0209	89.9995	44.7517	95.0255	47.7535	20.822
Ma10_g28540	30.4034	78.738	35.6801	83.6762	66.7172	19.3669
Ma10_g28570	8.1196	7.03614	5.91035	10.7161	5.91318	3.81218
Ma10_g28770	5.95089	8.90128	5.24356	8.77536	6.43223	5.6017
Ma10_g29090	15.0128	23.454	13.4786	20.7939	20.3435	12.726
Ma10_g29170	135.839	123.975	73.0951	270.827	92.3367	48.4118
Ma10_g29250	100.975	127.539	60.2982	102.594	112.635	63.4108
Ma10_g30240	20.5312	26.1089	19.7674	32.2021	25.8594	10.0776
Ma10_g30320	938.232	1005.86	430.803	995.894	1230.64	206.178
Ma11_g00320	1.01841	1.12533	0.314148	1.26321	0.613727	0.231426
Ma11_g00550	14.4268	17.5444	15.0048	19.6225	18.3776	10.4568
Ma11_g00930	3.50246	4.68238	1.11689	1.83005	2.69537	0.460804
Ma11_g01360	23.7183	26.1025	9.30643	33.2479	17.2957	8.3345
Ma11_g01510	108.575	166.74	91.4664	176.118	191.735	65.579
Ma11_g02120	1.1844	3.8112	1.61567	12.1105	3.56706	0.33701
Ma11_g02200	31.5209	31.9914	13.8007	35.0076	30.3297	13.3679
Ma11_g02590	13.3687	19.9776	9.16803	29.6496	16.9489	6.08789
Ma11_g02630	14.3964	14.6363	4.12565	16.6212	21.0967	0.515593
Ma11_g02680	1.22748	1.44699	1.02044	1.14413	1.1798	0.366875
Ma11_g02930	11.1144	15.2465	10.3644	17.5551	15.4788	8.85697
Ma11_g03070	42.4935	41.4871	24.5268	41.055	41.2068	19.577
Ma11_g03140	1.18417	2.31661	0.53346	2.24606	0.803061	0.49815
Ma11_g03400	96.2699	324.696	49.9597	120.229	52.55	10.1346
Ma11_g03550	162.508	226.229	177.818	325.077	245.686	79.1245
Ma11_g03880	119.976	140.631	134.067	235.492	162.072	70.1337
Ma11_g03920	569.249	785.716	231.539	1186.34	736.211	140.164
Ma11_g04610	97.3548	86.155	58.8579	84.1345	110.978	47.3237
Ma11_g04840	61.7157	79.7618	45.1389	122.19	85.6872	49.8604
Ma11_g05230	275.465	129.876	100.666	378.846	130.512	20.995
Ma11_g05690	94.9036	111.883	31.5952	108.024	82.9248	37.2742
Ma11_g06940	4.96536	5.21371	4.84858	7.02036	5.22215	3.95127
Ma11_g07640	67.0859	126.614	61.7063	88.2896	68.3403	47.1902
Ma11_g07800	32.4435	39.7689	24.8008	51.7633	32.7245	20.6432
Ma11_g08470	16.645	16.7196	11.7848	15.6556	14.1077	5.84545
Ma11_g08650	33.3604	46.3313	23.6888	37.222	31.6973	21.846
Ma11_g08770	88.2826	77.9551	67.2864	109.218	80.006	55.3412
Ma11_g08800	19.5926	16.0115	2.55176	17.7199	22.2447	2.34339
Ma11_g08810	18.8553	24.7411	13.6263	22.764	20.9232	7.46316
Ma11_g08860	4.06974	4.62384	3.99561	5.82311	4.78839	2.68275
Ma11_g09480	9.38197	9.69407	5.93539	7.87334	5.97839	3.69388
Ma11_g10780	15.3102	13.7038	9.63961	18.4938	17.7705	8.53377
Ma11_g10900	25.1132	37.1744	12.9716	36.8817	25.0035	4.04803
Ma11_g11030	21.691	29.0354	18.7349	39.7619	29.0603	14.3521
Ma11_g11070	13.3198	14.0479	12.7817	13.8698	12.9683	11.3011
Ma11_g11240	28.1547	39.2722	16.7812	27.2254	24.3973	15.2794
Ma11_g11290	234.614	365.25	224.411	721.886	445.402	100.088
Ma11_g12660	66.2259	143.185	62.5137	284.569	96.184	40.5652
Ma11_g12990	26.4884	34.0928	26.7261	50.5703	29.9433	15.9478
Ma11_g13140	5.07676	9.21221	2.14178	5.91783	5.13751	1.96694
Ma11_g13680	41.5074	50.6899	47.4066	49.2199	55.7517	16.2547
Ma11_g13750	75.8339	142.497	84.8739	133.085	111.997	68.2983
Ma11_g14250	540.731	779.386	441.745	844.304	651.199	348.311
Ma11_g14400	575.311	311.106	104.089	703.061	299.116	25.0142
Ma11_g14590	35.9141	134.236	21.3249	55.5794	37.0568	14.1338
Ma11_g14660	6.24657	15.4273	3.92299	12.0288	3.03851	0.780194
Ma11_g14730	68.0085	81.5147	22.2984	165.37	52.5185	4.85216
Ma11_g16870	192.608	149.512	134.695	296.524	117.207	22.0658
Ma11_g17090	105.833	106.354	68.0827	208.159	174.484	37.7293
Ma11_g17120	38.1229	94.0256	21.3241	141.26	85.7758	10.0952
Ma11_g17340	8.02864	9.76856	1.79775	5.27348	10.2077	1.15106
Ma11_g17540	1602.9	2130.21	991.826	2927.38	1433	248.98
Ma11_g18330	14.2043	23.7041	11.1038	16.3596	14.1056	9.87939
Ma11_g18530	2153.95	2068.88	1523.27	5426.6	3577.78	345.419
Ma11_g18960	83.798	115.01	58.774	168.759	38.8609	11.7785
Ma11_g19020	107.961	132.829	96.8185	185.86	161.157	75.4066
Ma11_g19320	433.384	925.373	165.474	932.154	1015.5	80.3017
Ma11_g19420	10.0623	10.5789	6.49319	8.92345	9.34613	5.80288
Ma11_g19540	2.60873	2.94687	2.71682	2.58158	2.73634	1.27032
Ma11_g19850	8.31653	10.3023	7.80016	10.9836	9.64388	7.67786
Ma11_g19920	45.0201	67.8309	38.8718	47.5561	43.6142	22.0794
Ma11_g20100	4.23212	10.6442	4.49227	8.23599	4.29452	2.8617
Ma11_g20110	96.2882	74.0742	14.8138	81.3455	65.4462	12.2832
Ma11_g20220	45.1226	43.5929	32.5694	76.6052	36.6815	20.3619
Ma11_g21010	12.4595	7.65125	5.56446	14.0377	9.80737	2.70508
Ma11_g21230	104.073	169.771	74.2756	155.192	217.439	47.9058
Ma11_g21380	44.7934	49.498	25.9918	50.9219	53.9476	21.7464
Ma11_g21860	15.1673	15.2055	4.42263	12.17	6.07078	3.14549
Ma11_g21870	47.4781	49.7282	12.8732	58.1003	12.6557	4.00327
Ma11_g21880	6.59718	7.87264	6.68214	7.34474	8.01406	2.39698
Ma11_g22160	21.1547	21.2461	17.3698	21.9494	16.5947	11.6751
Ma11_g22440	704.701	683.49	201.453	668.823	799.257	221.669
Ma11_g22860	43.874	40.053	32.0243	41.1336	28.8576	19.5295
Ma11_g23090	581.764	256.395	110.649	691.788	511.083	8.78984
Ma11_g23120	126.013	149.567	138.273	180.646	173.896	46.9734
Ma11_g23160	57.1216	55.4812	25.0217	60.3299	24.7688	14.4588
Ma11_g23920	126.575	175.307	106.783	190.29	207.521	89.6776
Ma11_g23940	375.077	326.628	105.409	744.69	366.911	53.4101
Ma11_g23950	170.466	205.527	72.4344	202.389	242.513	36.9206
Ma11_g24370	105.171	169.914	56.4159	100.117	198.302	40.0677
Ma11_g24430	8.38727	9.15561	8.76182	9.41747	8.98344	8.27552

[truncated: 5 more sheets: Table S11, Table S12, Table S13, Table S14, Table S15]
